# Genetic basis and dual adaptive role of floral pigmentation in sunflowers

Marco Todesco<sup>1</sup>, Natalia Bercovich<sup>1</sup>, Amy Kim<sup>1</sup>, Ivana Imerovski<sup>1</sup>, Gregory L. Owens<sup>1,2</sup>, Óscar Dorado Ruiz<sup>1</sup>, Srinidhi V. Holalu<sup>3</sup>, Lufiani L. Madilao<sup>4</sup>, Mojtaba Jahani<sup>1</sup>, Jean-Sébastien Légaré<sup>1</sup>, Benjamin K. Blackman<sup>3</sup>, Loren H. Rieseberg<sup>1</sup>

<sup>1</sup> *Department of Botany and Biodiversity Research Centre, University of British Columbia, Vancouver, British Columbia, Canada.*

<sup>2</sup> *Department of Biology, University of Victoria, Victoria, British Columbia, Canada.*

<sup>3</sup> *Department of Plant and Microbial Biology, University of California, Berkeley, Berkeley, California, USA.*

<sup>4</sup> *Michael Smith Laboratory and Wine Research Centre, University of British Columbia, Vancouver, British Columbia, Canada.*

## Abstract

Variation in floral displays, both between and within species, has been long known to be shaped by the mutualistic interactions that plants establish with their pollinators<sup>1</sup>. However, increasing evidence suggests that abiotic selection pressures influence floral diversity as well<sup>2-6</sup>. Here we analyze the genetic and environmental factors that underlie patterns of floral pigmentation in wild sunflowers. While sunflower inflorescences appear invariably yellow to the human eye, they display extreme diversity for patterns of ultraviolet pigmentation, which are visible to most pollinators<sup>7,8</sup>. We show that this diversity is largely controlled by cis-regulatory variation at a single MYB transcription factor, HaMYB111, through accumulation of UV-absorbing flavonol glycosides. As expected, different patterns of ultraviolet pigments in flowers have a strong effect on pollinator preferences. However, variation for floral ultraviolet patterns is also associated with environmental variables, especially relative humidity, across populations of wild sunflowers. Larger ultraviolet patterns, which are found in drier environments, limit transpiration, therefore reducing water loss. The dual role of floral UV patterns in pollination attraction and abiotic responses reveals the complex adaptive balance underlying the evolution of floral traits.

The diversity in colour and colour patterns found in flowers is one of the most extraordinary examples of adaptive variation in the plant world. As remarkable as the variation that we can observe is, even more of it lays just outside our perception. Many species accumulate pigments that absorb ultraviolet (UV) radiation in their flowers; while these patterns are invisible to the human eye, they can be perceived by pollinators, most of which can see in the near UV<sup>7,8</sup>. UV patterns have been shown to increase floral visibility, and to have a major influence on pollinator visitation and preference<sup>9-11</sup>. Besides their role in pollinator attraction, patterns of UV-absorbing pigments in flowers have also been linked, directly or indirectly, to other biotic and abiotic factors<sup>3,12,13</sup>.

Sunflowers have come to enjoy an iconic status in popular culture (as testified by the, arguably dubious, honour of being one of the only five flower species with a dedicated emoji<sup>14</sup>). This is despite being apparently largely immune from the aforementioned diversification for flower colour; all 50 species of wild sunflowers have ligules (the enlarged modified petals of the outermost whorl of florets in the sunflower inflorescences) that appear of the same bright yellow colour to the human eye. However, ligules also accumulate UV-absorbing pigments at their base, while their tip reflects UV radiation<sup>15</sup>. Across the whole inflorescence, this results in a bullseye pattern with an external UV-reflecting ring and an internal UV-absorbing ring. Besides their well-described role in pollinator attraction, UV bullseyes have been proposed to act as nectar guides, helping pollinators orient towards nectar rewards once they land on the petal, although recent experiments have challenged this hypothesis<sup>16</sup>. Considerable variation in the size of UV bullseye patterns has been observed between and within plant species<sup>13,17</sup>; however, little is known about the ecological factors that drive this variation, or the genetic determinants that control it.

## Floral UV patterns in wild sunflowers

A preliminary screening of 15 species of wild sunflowers, as well as cultivated sunflower, suggested that UV bullseye patterns are common across sunflower species (Extended Data Fig. 1). We also observed substantial within-species variation for the size of UV floral patterns. Variation for UV bullseye size was previously reported in the silverleaf sunflower *Helianthus argophyllus*; however, genetic mapping resolution was insufficient to identify individual causal genes<sup>18</sup>. To better understand the function and genetic regulation of variation for floral UV pigmentation, we focused on two widespread species of annual sunflowers, *H. annuus* (the progenitor of the domesticated sunflower) and *H. petiolaris*; both have broad distributions across North America, but the latter prefers sandier soils<sup>19</sup>. Over two growing seasons, we measured UV floral patterns (as the proportion of the ligule that absorbs UV radiation, henceforth “Ligule UV proportion” or “LUVp”) in 1589 *H. annuus* individuals derived from 110 distinct natural populations, and 351 *H. petiolaris* individuals from 40 populations, grown in common garden experiments in Vancouver, Canada<sup>19</sup> (Fig. 1a,b; Supplementary Table 1). While extensive variation was observed within both species, it was particularly striking for *H. annuus*, which displayed a phenotypic continuum from ligules with almost no UV pigmentation to ligules that were entirely UV-absorbing (Fig. 1c-e). A relatively high proportion of *H. annuus* individuals (~13%) had completely UV-absorbing ligules and therefore lacked UV “nectar guides”, suggesting that pollinator orientation is not a necessary function of floral UV pigmentation in sunflower.

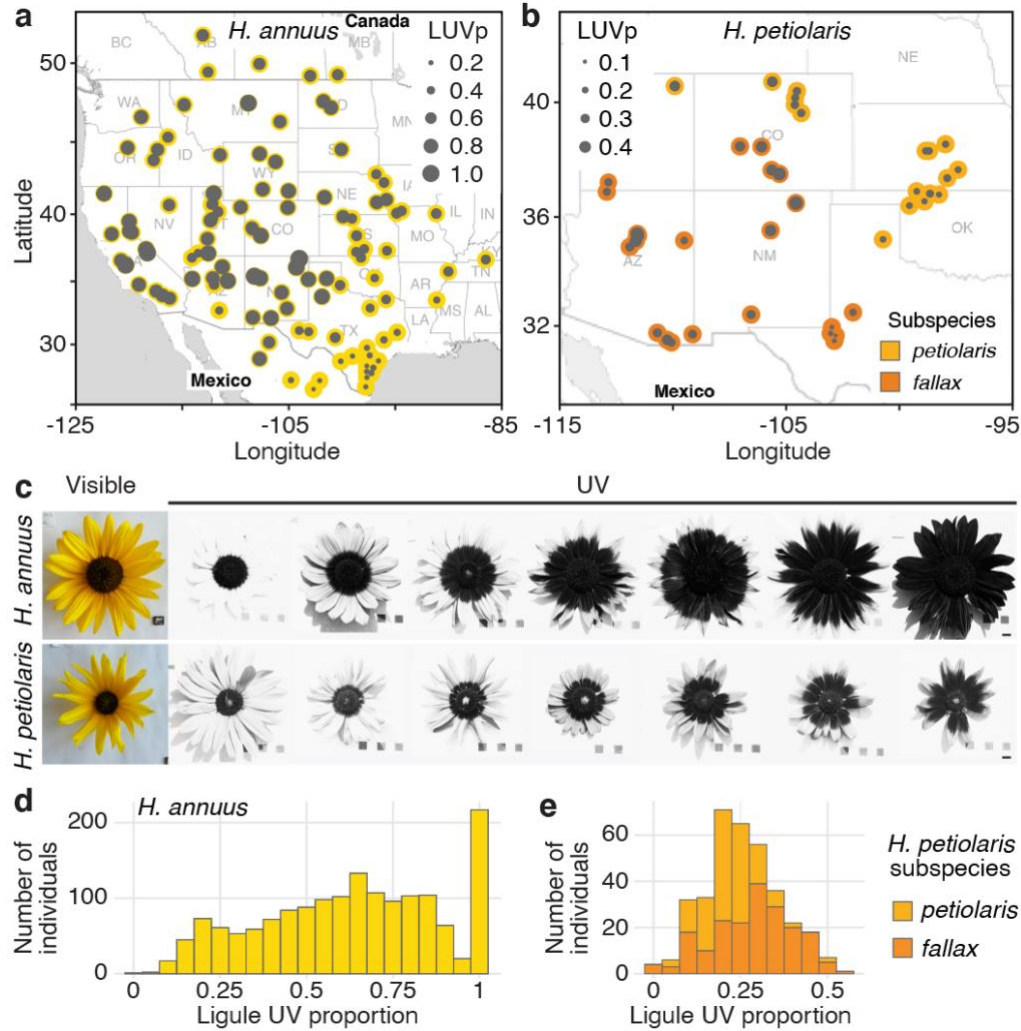

**Fig. 1: Diversity for floral UV pigmentation patterns in wild sunflowers.**

**a**, Geographical distribution of sampled populations for *H. annuus* and **b**, *H. petiolaris*. Yellow/orange dots represent different populations, overlaid grey dots size is proportional to the population mean LUVp. **c**, Range of variation for floral UV pigmentation patterns in the two species. Scale bar = 1 cm. **d**, LUVp values distribution for *H. annuus* and **e**, *H. petiolaris* subspecies.

## Genetic control of floral UV patterning

To identify the loci controlling variation for floral UV patterning, we performed a genome-wide association study (GWAS). We used a subset of the phenotyped plants (563 of the *H. annuus* and all 351 *H. petiolaris* individuals) for which we previously generated genotypic data at >4.6M high-quality single-nucleotide polymorphisms (SNPs)<sup>19</sup>. Given their relatively high level of genetic differentiation, analyses were performed separately for the *petiolaris* and *fallax* subspecies of *H. petiolaris*<sup>19</sup>. We detected several genomic regions significantly associated with UV patterning in *H. petiolaris petiolaris*, and a particularly strong association ( $P = 5.81e^{-25}$ ) on chromosome 15 in *H. annuus* (Fig. 2a,b; Extended Data Fig. 2a). The chromosome 15 SNP with the strongest association with ligule UV pigmentation patterns in *H. annuus* (henceforth “Chr15\_LUVp SNP”) explained 62% of the observed variation, and allelic distributions at this SNP closely matched that of floral UV patterns (Fig. 2c, compare to Fig. 1a; Supplementary Table 2).

Genotype at the Chr15\_LUVp SNP had a remarkably strong effect on the size of UV bullseyes in inflorescences. Individuals homozygous for the “large” (L) allele had a mean LUVp of 0.78 (st.dev  $\pm 0.16$ ), i.e.  $\sim 3/4$  of the ligule was UV-absorbing, while individuals homozygous for the “small” (S) allele had a mean LUVp of 0.33 (st.dev.  $\pm 0.15$ ), i.e. only the basal  $\sim 1/3$  of the ligule absorbed UV radiation. Consistent with the trimodal LUVp distribution observed for *H. annuus* (Fig. 1d), alleles at this locus showed additive effects, with heterozygous individuals having intermediate phenotypes (LUVp =  $0.59 \pm 0.18$ ; Fig. 2d). The association between floral UV patterns and the Chr15\_LUVp SNP was confirmed in the F<sub>2</sub> progeny of crosses between plants homozygous for the L allele (Large; with completely UV-absorbing ligules; LUVp = 1) and for the S allele (Small; with a small UV-absorbing patch at the ligule base; LUVp < 0.18; Fig. 2e, Extended Data Fig. 3a). Average LUVp values were lower, and their range smaller, when these

populations were grown in a greenhouse rather than in a field. Plants in the greenhouse experienced relatively uniform temperatures and humidity, and were shielded from most UV radiation. This suggests that while floral UV patterns have a strong genetic basis (consistent with previous observations<sup>17</sup>), their expression is also affected by the environment.

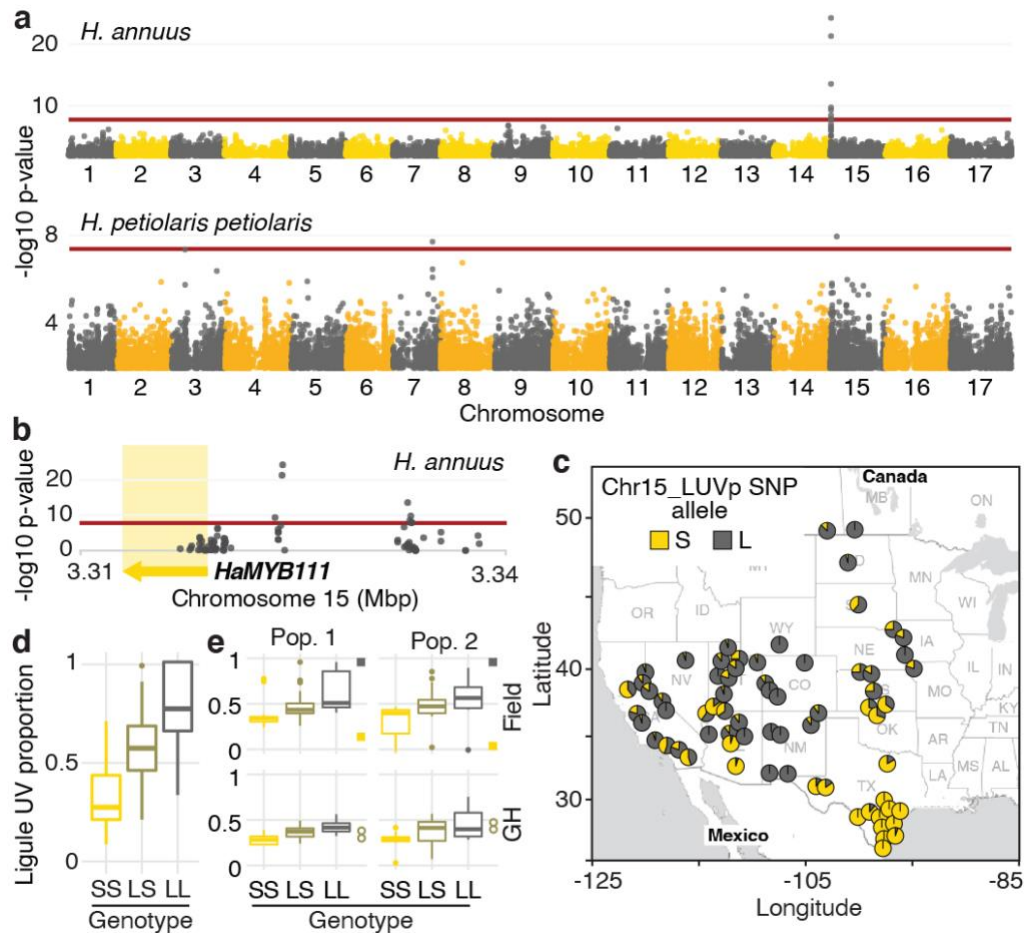

**Fig. 2: A single locus explains most of the variation in floral UV patterning in *H. annuus*.**

**a**, LUVp GWAS. **b**, Zoomed-in Manhattan plot for the chromosome 15 LUVp peak in *H. annuus*. Red lines represent 5% Bonferroni-corrected significance. GWAs were calculated using two-sided mixed models. Number of individuals:  $n = 563$  individuals (*H. annuus*);  $n = 159$  individuals (*H. petiolaris petiolaris*). Only positions with  $-\log_{10} p\text{-value} > 2$  are plotted. **c**, Geographic distribution of Chr15\_LUVp SNP allele frequencies in *H. annuus*. L = Large and S = Small allele. **d**, LUVp associated with different genotypes at Chr15\_LUVp SNP in natural

populations of *H. annuus* grown in a common garden. All pairwise comparisons are significant for  $P < 10^{-16}$  (one-way ANOVA with post-hoc Tukey HSD test,  $F = 438$ ,  $df = 2$ ;  $n = 563$  individuals). **e**, LUVp associated with different genotypes at Chr15\_LUVp SNP in *H. annuus* F<sub>2</sub> populations grown in the field or in a greenhouse (GH). Measurements for the parental generations are shown: squares = grandparents (field-grown); empty circles = F<sub>1</sub> parents (greenhouse-grown; Extended Data Fig. 3a). Differences between genotypic groups are significant for  $P = 0.0057$  (Pop. 1 Field, one-way ANOVA,  $F = 5.73$ ,  $df = 2$ ;  $n = 54$  individuals);  $P = 0.0021$  (Pop. 2 Field, one-way ANOVA,  $F = 7.02$ ,  $df = 2$ ;  $n = 50$  individuals);  $P = 0.00015$  (Pop. 1 GH, one-way ANOVA,  $F = 11.13$ ,  $df = 2$ ;  $n = 42$  individuals);  $P = 0.054$  (Pop. 2 GH, one-way ANOVA,  $F = 3.17$ ,  $df = 2$ ;  $n = 38$  individuals). P-values for pairwise comparisons for panels d and f are reported in Supplementary Table 3. Boxplots show the median, box edges represent the 25<sup>th</sup> and 75<sup>th</sup> percentiles, whiskers represent the maximum/minimum data points within 1.5x interquartile range outside box edges.

### ***HaMYB111* regulates UV pigment production**

While no obvious candidate genes were found for the GWA peaks for floral UV pigmentation in *H. petiolaris petiolaris*, the *H. annuus* chromosome 15 peak is ~5 kbp upstream of *HaMYB111*, a sunflower homolog of the *Arabidopsis thaliana* *AtMYB111* gene (Fig. 2b). Together with *AtMYB11* and *AtMYB12*, *AtMYB111* is part of a small family of transcription factors (also called PRODUCTION OF FLAVONOL GLYCOSIDES, PFG) that controls the expression of genes involved in the production of flavonol glycosides in *Arabidopsis*<sup>20</sup>. Flavonol glycosides are a subgroup of flavonoids known to fulfill a variety of functions in plants, including protection against abiotic and biotic stresses (e.g. UV radiation, cold, drought, herbivory)<sup>21</sup>. Crucially, they absorb strongly in the near UV range (300-400 nm), and are the pigments responsible for floral UV patterns in several plant species<sup>9,11,22</sup>. For instance, alleles of a homolog of *AtMYB111* are responsible for the evolutionary gain and subsequent loss of flavonol accumulation and UV



absorption in flowers of *Petunia* species, associated with two successive switches in pollinator preferences (from bees, to hawkmoths, to hummingbirds<sup>11</sup>). A homolog of *AtMYB12* has also been associated with variation in floral UV patterns in *Brassica rapa*<sup>9</sup>. Consistent with this, we found flavonol glycosides to be the main UV-absorbing pigments in sunflower ligules, accumulating at much higher levels at their base, and in ligules of plants with larger LUVp (Fig. 3a,b).

*AtMYB12* and *AtMYB111* are known to have the strongest effect on flavonol glycoside accumulation in Arabidopsis<sup>20</sup>. We noticed, from existing RNAseq data, that *AtMYB111* expression levels are particularly high in petals<sup>23</sup> (Fig. 3c), and found that Arabidopsis petals, while uniformly white in the visible spectrum, absorb strongly in the UV (Fig. 3d, Extended Data Fig. 4). To our knowledge, this is the first report of floral UV pigmentation in Arabidopsis, a highly selfing species which is seldom insect-pollinated<sup>24</sup>. Accumulation of flavonol glycosides in petals is strongly reduced, and UV pigmentation is almost completely absent, in petals of mutants for *AtMYB111* (*myb111*; Fig. 3d,e). UV absorbance is further reduced in petals of double mutants for *AtMYB12* and *AtMYB111* (*myb12/111*). However, petals of the single mutant for *AtMYB12* (*myb12*), which is expressed at low levels throughout the plant<sup>23</sup>, are indistinguishable from wild-type plants (Extended Data Fig. 3b). This shows that flavonol glycosides are responsible for floral UV pigmentation also in Arabidopsis, and that *AtMYB111* plays a fundamental role in controlling their accumulation in petals.

To confirm that sunflower *HaMYB111* is functionally equivalent to its Arabidopsis homolog, we introduced it into *myb111* plants. Expression of *HaMYB111*, either under the control of a constitutive promoter or of the endogenous *AtMYB111* promoter, restored petal UV pigmentation and induced accumulation of flavonol glycosides (Fig. 3d,e). *HaMYB111* coding sequences

obtained from wild sunflowers with large or small LUVp were equally effective at complementing the *myb111* mutant. Together with the observation that the strongest GWAS association with LUVp fell in the promoter region of *HaMYB111*, these results suggest that differences in the effect of the “small” and “large” alleles of this gene on floral UV pigmentation are not due to differences in protein function, but rather to differences in gene expression.

Analysis of *HaMYB111* expression in cultivated sunflower revealed that, consistent with a role in floral UV pigmentation and similar to its Arabidopsis counterpart, it is expressed specifically in ligules, and it is almost undetectable in other tissues<sup>25</sup> (Fig. 3f). Similar to observations in *Rudbeckia hirta*, another member of the *Heliantheae* tribe<sup>26</sup>, UV pigmentation is established early in ligule development in both *H. annuus* and *H. petiolaris*, as their visible colour turns from green to yellow before the inflorescence opens (R4 developmental stage<sup>27</sup>; Fig. 3g, Extended Data Fig. 3c). *HaMYB111* is highly expressed in the part of the ligule that accumulates UV-absorbing pigments, and especially in developing ligules, consistent with a role in establishing pigmentation patterns (Fig. 3h). We also observed a matching expression pattern for *HaFLS1*, the sunflower homolog of a gene encoding one of the main enzymes controlling flavonol biosynthesis in Arabidopsis (*FLAVONOL SYNTHASE 1*, *AtFLS1*), whose expression is regulated directly by *AtMYB111*<sup>20</sup> (Fig. 3i). Finally, we compared *HaMYB111* expression levels in a set of 46 field-grown individuals with contrasting LUVp values, representing 20 different wild populations. *HaMYB111* expression levels differed significantly between the two groups ( $P = 0.009$ ; Fig. 3j). Variation in expression levels within phenotypic classes was quite large; this is likely due in part to the strong dependence of *HaMYB111* expression on developmental stage (Fig. 3g), and the difficulty of accurately establishing matching ligule developmental stages across diverse wild sunflowers.

These expression analyses further point to *cis*-regulatory rather than coding sequence differences between *HaMYB111* alleles being responsible for LUVp variation. Accordingly, direct sequencing of the *HaMYB111* locus from multiple wild *H. annuus* individuals, using a combination of Sanger sequencing and long PacBio HiFi reads, identified no coding sequence variants associated with differences in floral UV patterns, or with alleles at the Chr15\_LUVp SNP. However, we observed extensive variation in the promoter region of *HaMYB111*, differentiating wild *H. annuus* alleles from each other and from the reference assembly for cultivated sunflower. Relaxing quality filters to include less well-supported SNPs in our LUVp GWAS did not identify additional variants with stronger associations than Chr15\_LUVp SNP (Extended Data Fig. 2b). However, many of the polymorphisms we identified by direct sequencing were either larger insertions/deletions (indels) or fell in regions that were too repetitive to allow accurate mapping of short reads, and would not be included even in this expanded dataset. While several of these variants in the promoter region of *HaMYB111* appeared to be associated with the Chr15\_LUVp SNP, further studies will be required to confirm this, and to identify their eventual effects on *HaMYB111* activity.

Interestingly, when we sequenced the promoter region of *HaMYB111* in several *H. argophyllus* and *H. petiolaris* individuals, we found that they all carried the S allele at the Chr15\_LUVp SNP. Similarly, in a set of previously re-sequenced wild sunflowers, we found the S allele to be fixed in several perennial (*H. decapetalus*, *H. divaricatus* and *H. grosseserratus*) and annual sunflower species (*H. argophyllus*, *H. niveus*, *H. debilis*), and to be at >0.98 frequency in *H. petiolaris*, suggesting that the “small” haplotype is ancestral. Conversely, the L allele at Chr15\_LUVp SNP was almost fixed (>0.98 frequency) in a set of 285 cultivated sunflower lines<sup>28</sup>. Consistent with these patterns, UV bullseyes are considerably smaller in *H. argophyllus* (average LUVp  $\pm$  st.dev.

=  $0.27 \pm 0.09$ ), *H. niveus* ( $0.15 \pm 0.09$ ), and *H. petiolaris* ( $0.27 \pm 0.12$ ; Fig. 1e) than in cultivated sunflower lines ( $0.62 \pm 0.23$ ). Additionally, while 50 of the cultivated sunflower lines had completely or almost completely UV-absorbing ligules (LUVp > 0.8), no such case was observed in the other three species (Extended Data Fig. 4).

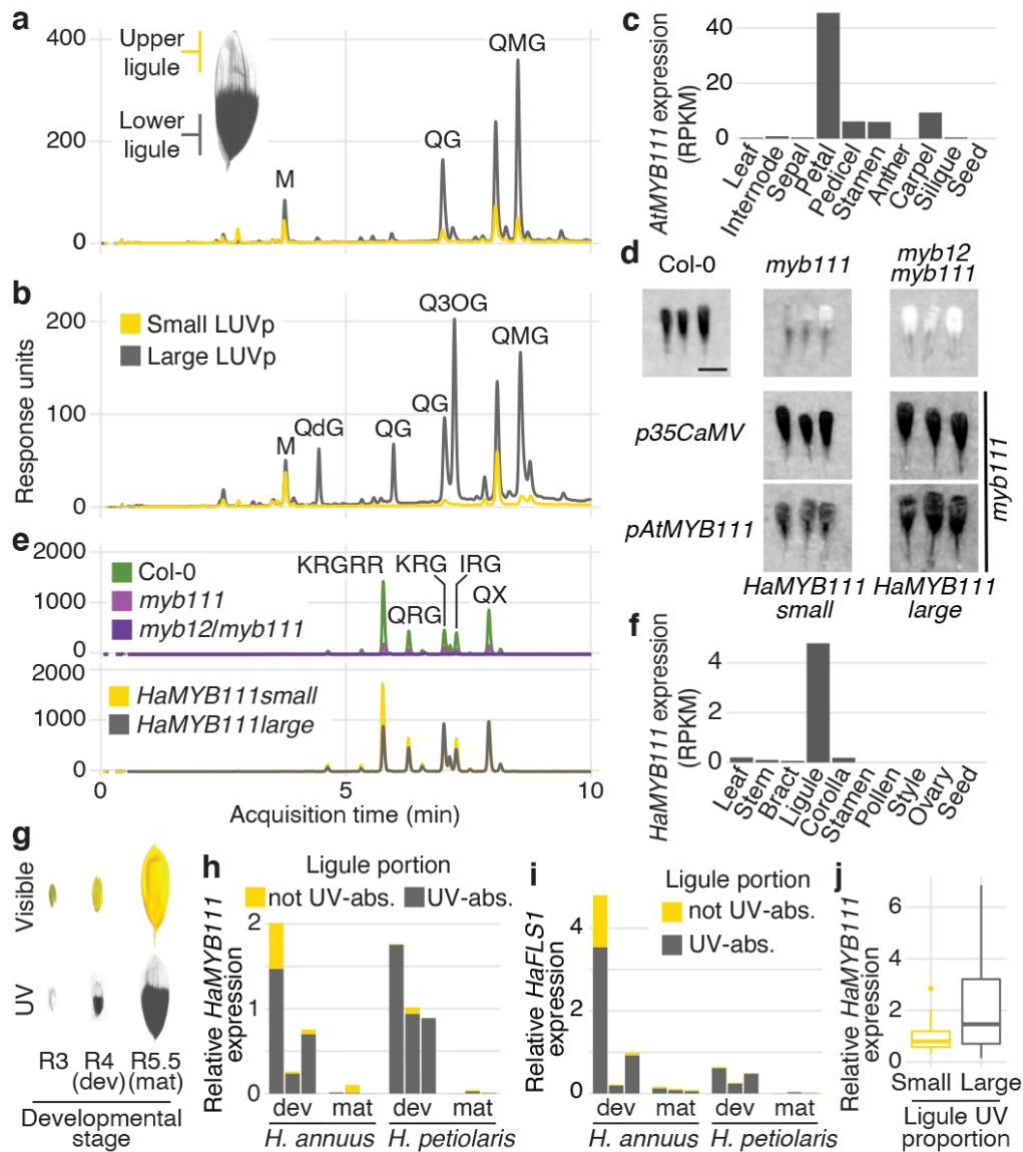

**Fig. 3: *MYB111* is associated with floral UV pigmentation patterns and flavonol accumulation in sunflower and Arabidopsis.**

**a**, UV chromatograms (350 nm) of the upper and lower third of ligules with intermediate UV patterns, and **b**, of ligules with large and small floral UV patterns. Peaks corresponding to flavonols are labelled (Supplementary Table 4). **c**, Expression levels of *AtMYB111* in Arabidopsis. RPKM = Reads Per Kilobase of transcript per Million mapped reads. **d**, UV pictures of Arabidopsis petals. *HaMYB111* from *H. annuus* plants with small or large LUVp was introduced into the Arabidopsis *myb111* mutant under the control of a constitutive promoter (*p35SCaMV*) or of the promoter of the Arabidopsis homolog (*pAtMYB111*). All petals are white in the visible range (Extended Data Fig. 3b). Scale bar = 1mm. **e**, UV chromatograms (350 nm) of petals of Arabidopsis lines. Upper panel: wild-type Col-0 and mutants. Bottom panel: *p35SCaMV::HaMYB111* lines in *myb111* background. Peaks corresponding to flavonols are labelled (Supplementary Table 4). **f**, Expression levels of *HaMYB111* in cultivated sunflower. **g**, Pigmentation patterns in ligules of wild *H. annuus* at different developmental stages: R3 = closed inflorescence bud; R4 = inflorescence bud opening; R5 = inflorescence fully opened. **h**, Expression levels in the UV-absorbing (grey) and UV-reflecting (yellow) portion of mature (mat) and developing (dev) ligules for *HaMYB111* and **i**, *HaFLS1*, one of its putative targets. Each bar represents a separate individual. **j**, *HaMYB111* expression levels in field-grown wild *H. annuus* with different floral UV pigmentation patterns. The difference between the two groups is significant for  $P = 0.009$  (Welch t-test,  $t = 2.81$ ,  $df = 27.32$ , two-sided;  $n = 46$  individuals). Boxplots show the median, box edges represent the 25<sup>th</sup> and 75<sup>th</sup> percentiles, whiskers represent the maximum/minimum data points within 1.5x interquartile range outside box edges.

### **A dual role for floral UV pigmentation**

Although our results show that *HaMYB111* explains most of the variation in floral UV pigmentation patterns in wild *H. annuus*, why such variation exists in the first place is less clear. Several hypotheses have been advanced to explain the presence of floral UV patterns and their variability. Like their visible counterparts, UV pigments play a fundamental role in pollinator attraction<sup>10,11,16</sup>. For example, in *Rudbeckia* species, artificially increasing the size of bullseye

patterns to up to 90% of the petal surface resulted in rates of pollinator visitation equal to or higher than wild-type flowers (which have on average 40-60% of the petal being UV-absorbing). Conversely, reducing the size of the UV bullseye had a strong negative effect on pollinator visitation<sup>10</sup>. To test whether the relative size of UV bullseye patterns affected pollination, we compared insect visitation rates for wild *H. annuus* lines with contrasting UV bullseye patterns. An initial experiment, carried out in Vancouver (Canada), found that flowers with large UV patterns received significantly more visits (Fig. 4a). Vancouver is outside the natural range of *H. annuus*, suggesting that our results are unlikely to be affected by learned preferences (i.e. pollinators preferring UV patterns they are familiar with in sunflower). While this experiment revealed a clear pattern of pollinator preferences, it involved plants from only two different populations, and effects of other unmeasured factors unrelated to UV pigmentation on visitation patterns cannot be excluded. Therefore, we monitored pollinator visitation in plants grown in a field including 1484 individuals from 106 *H. annuus* populations, spanning the entire range of the species. Within this field, we selected 82 plants, from 49 populations, which flowered at roughly the same time and had comparable numbers of flowers. We divided these plants into three categories, based on the species-wide distribution of LUVp values in *H. annuus* (Fig. 1d): small (0-0.3); intermediate (0.5-0.8) and large (>0.95) LUVp. Plants with intermediate UV patterns had the highest visitation rates (Fig. 4b, Extended Data Fig. 5). Visitation to plants with small or large UV patterns was less frequent, and particularly low for plants with very small LUVp values (<0.15). A strong reduction in pollination would be expected to result in lower fitness, and to be negatively selected; accordingly, plants with such small LUVp values were rare (~1.5% of the individuals grown). These results confirm that floral UV patterns play a major role in pollinator attraction, as has been already extensively reported<sup>10,11,16</sup>. They also agree with

previous findings in other plant species<sup>10,16</sup> suggesting that intermediate-to-large UV bullseyes are preferred by pollinators, and only very small UV bullseyes are maladaptive. While we cannot exclude that smaller UV bullseyes would be preferred by pollinators in some parts of the *H. annuus* range, this does not seem likely; the most common pollinators of sunflower are ubiquitous across the range of *H. annuus*, and many bee species known to pollinate sunflower are found in both regions where *H. annuus* populations have large LUVp and regions where they have small LUVp<sup>29</sup>. While acting as visual cues for pollinators is therefore clearly a major function of floral UV bullseyes, it is unlikely to (fully) explain the patterns of variation that we observe for this trait.

In recent years, the importance of non-pollinator factors in driving selection for floral traits has been increasingly recognized<sup>6</sup>. Additionally, flavonol glycosides, the pigments responsible for floral UV patterns in sunflower, are known to be involved in responses to several abiotic stressors<sup>21,30,31</sup>. Therefore, we explored whether some of these stressors could drive diversification in floral UV pigmentation. An intuitively strong candidate is UV radiation, which can be harmful to plant cells<sup>32</sup>. Variation in the size of UV bullseye patterns across the range of *Argentina anserina* (a member of the *Rosaceae* family) has been shown to correlate positively with intensity of UV radiation. Flowers of this species are bowl-shaped, and larger UV-absorbing regions have been proposed to protect pollen from UV damage by absorbing UV radiation that would otherwise be reflected toward the anthers<sup>3</sup>. However, sunflower inflorescences are much flatter than *A. anserina* flowers, making it unlikely that any significant amount of UV radiation would be reflected from the ligules towards the disk flowers. Studies in another plant with non-bowl-shaped flowers (*Clarkia unguiculata*) have found no evidence of an effect of floral UV patterns in protecting pollen from UV damage<sup>33</sup>. Consistent with this, the

associations between the intensity of UV radiation at our collection sites and floral UV patterns in *H. annuus* was weak (*H. annuus*:  $R^2 = 0.01$ ,  $P = 0.12$ ; Fig. 4c, Extended Data Fig. 6).

Across the *Potentillae* tribe (*Rosaceae*), floral UV bullseye size is also weakly associated with UV radiation, but is more strongly correlated with temperature, with lower temperatures being associated with larger UV bullseyes<sup>13</sup>. We found a similar, strong correlation with temperature in our dataset, with average summer temperatures explaining 44% of the variation in LUVp in *H. annuus* ( $P = 2.4 \times 10^{-15}$ ; Fig. 4d, Extended Data Fig. 6). It has been suggested that the radiation absorbed by floral UV pigments could contribute to increasing the temperature of the flower, similar to what has been observed for visible pigments<sup>4</sup>. This possibility is particularly intriguing for sunflower, in which flower temperature plays an important role in pollinator attraction; inflorescences of cultivated sunflowers consistently face East so that they warm up faster in the morning, making them more attractive to pollinators<sup>34</sup>. Larger UV bullseyes could therefore contribute to increasing temperature of the sunflower inflorescences, and their attractiveness of sunflowers to pollinators, in cold climates. However, different levels of UV pigmentation had no effect on the temperature of inflorescences or individual ligules exposed to sunlight (Fig. 4e-g, Extended Data Fig. 7). This is perhaps not surprising, given that UV wavelengths represents only a small fraction (3-7%) of the solar radiation reaching the Earth surface (compared to >50% for visible wavelengths), and are therefore unlikely to provide sufficient energy to significantly warm up the ligules<sup>35</sup>.

While several geoclimatic variables are correlated across the range of wild *H. annuus*, the single variable explaining the largest proportion of the variation in floral UV patterns in this species (51%) was summer relative humidity (RH,  $P = 1.4 \times 10^{-18}$ ; Fig. 4h, Extended Data Fig. 6), with



lower humidity being associated with larger LUVp values. Lower relative humidity is generally associated with higher transpiration rates in plants, leading to increased water loss. Flavonol glycosides are known to play an important role in responses to drought stress<sup>36</sup>; in particular, *Arabidopsis* lines that accumulate higher concentrations of flavonol glycosides due to over-expression of *AtMYB12* lose water and desiccate at slower rates than wild-type plants<sup>30</sup>. Similarly, we found that completely UV-absorbing ligules desiccate significantly slower than largely UV-reflecting ligules (Fig. 4i). This difference is not due to general differences in transpiration rates between genotypes, since we observed no comparable trend for rates of leaf desiccation in the same set of sunflower lines (Fig. 4j). Transpiration from flowers can be a major source of water loss for plants, and this is known to drive, within species, the evolution of smaller flowers in populations living in dry locations<sup>2,37</sup>. Thus, variation in floral UV pigmentation in sunflowers is likely similarly driven by the role of flavonol glycosides in reducing water loss from ligules, with larger floral UV patterns helping prevent drought stress in drier environments.

One of the main roles of transpiration in plants is facilitating heat dispersion at higher temperatures through evaporative cooling<sup>38</sup>, which could explain the strong correlation between LUVp and temperature across the range of *H. annuus* (Fig. 4d). Consistent with this, summer relative humidity and summer temperatures together explain a considerably larger fraction of the variation for LUVp in *H. annuus* than either variable alone ( $R^2 = 0.63$ ;  $P = 0.0017$ ; Supplementary Table 1), with smaller floral UV patterns being associated with higher relative humidity and higher temperatures (Extended Data Fig. 6). Despite a more limited range of variation for LUVp, the same trend is present also in *H. petiolaris* (Extended Data Fig. 8). Consistent with a role of floral UV pigmentation in the plant's response to variation in both

humidity and temperature, we found strong associations ( $dB > 10$ ) between SNPs in the *HaMYB111* region and these variables in genotype-environment association (GEA) analyses (Fig. 4k; Supplementary Table 7).

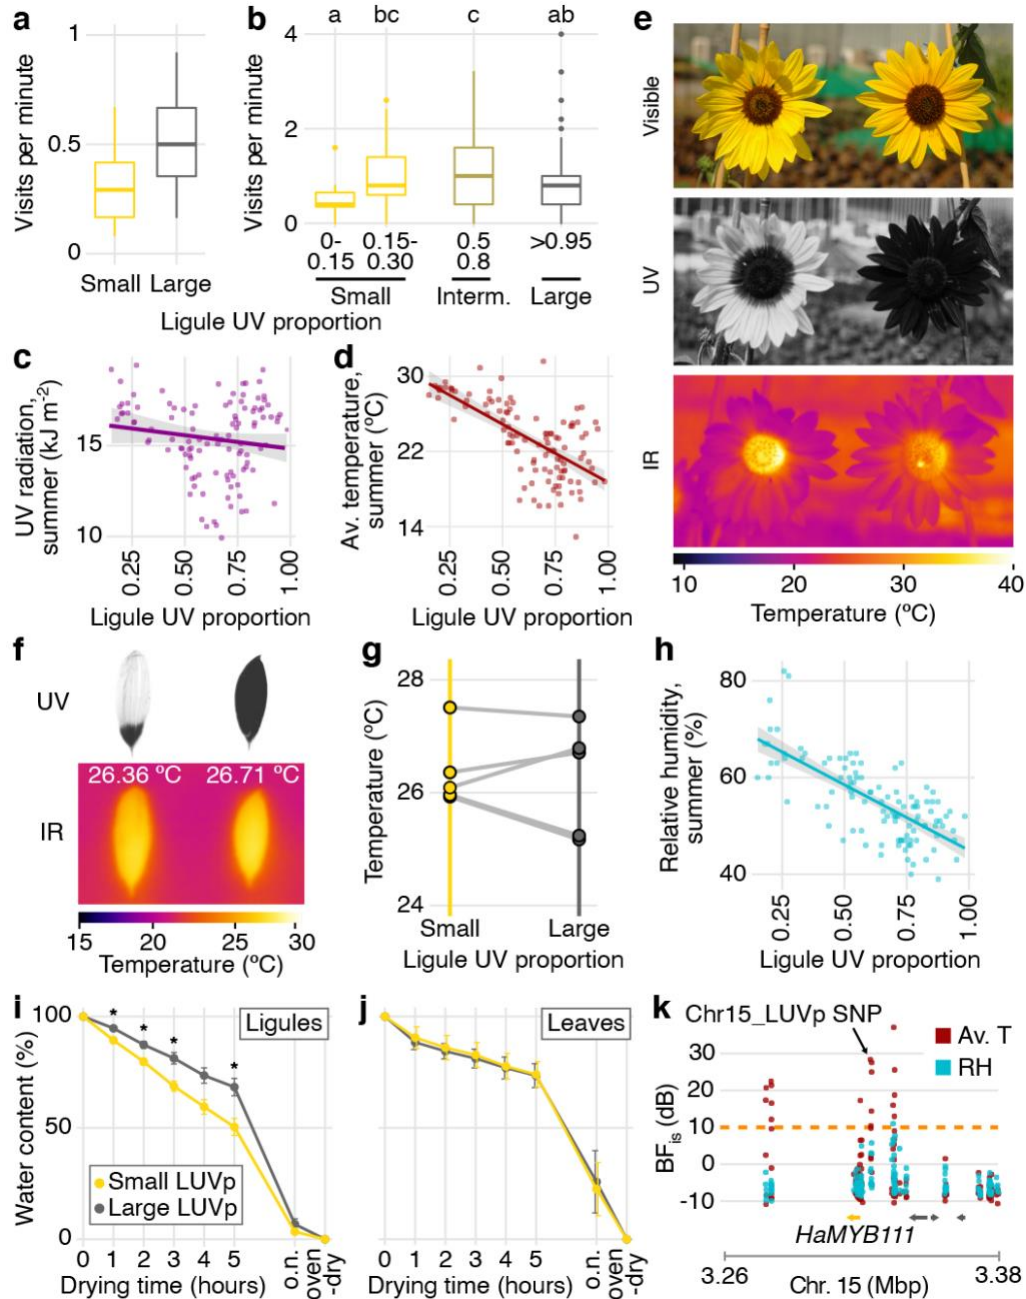

**Fig. 4: Accumulation of UV pigments in flowers affects pollinator visits and transpiration rates.**

**a**, Rates of pollinator visitation measured in Vancouver in 2017 ( $P = 0.017$ ; Mann-Whitney U-tests,  $W = 150$ , two-sided;  $n = 143$  pollinator visits) and **b**, in 2019 (differences between LUVp categories are significant for  $P = 0.0058$ , Kruskal-Wallis test,  $\chi^2 = 14.54$ ,  $df = 4$ ;  $n = 1390$  pollinator visits. Letters identify groups that are significantly different for  $P < 0.05$  in pairwise comparisons, Wilcoxon rank sum test. Exact p-values in Supplementary Table 5). Boxplots show the median, box edges represent the 25<sup>th</sup> and 75<sup>th</sup> percentiles, whiskers represent the maximum/minimum data points within 1.5x interquartile range outside box edges. **c**, Correlation between average LUVp for different populations of *H. annuus* and summer UV radiation ( $R^2 = 0.01$ ,  $P = 0.12$ ) or **d**, summer average temperature ( $R^2 = 0.44$ ,  $P = 2.4 \times 10^{-15}$ ). Grey areas represent 95% confidence intervals. **e**, Sunflower inflorescences pictured in the visible, UV and infrared (IR) range. In the IR picture, a bumblebee is visible in the inflorescence with large LUVp (right). The higher temperature in the inflorescence with small LUVp does not depend on ligule UV patterns (Extended Data Fig. 7). **f**, *H. annuus* ligules after having been exposed to sunlight for 15 minutes. **g**, Pairs of ligules from different sunflower lines were exposed to sunlight for 15 minutes, and their average temperature was measured from IR pictures. **h**, Correlation between average LUVp in *H. annuus* populations and summer relative humidity ( $R^2 = 0.51$ ,  $P = 1.4 \times 10^{-18}$ ). The grey area represents the 95% confidence interval. **i**, Rate of water loss from ligules and **j**, leaves of wild *H. annuus* plants with large or small LUVp. Values reported are averages  $\pm$  standard error of the mean.  $n = 16$  (ligules) or 15 (leaves). Ligules and leaves were left to air-dry and weighed every hour for five hours, after they were left to air-dry overnight (o.n.) and after they were incubated in an oven to remove any residual humidity (oven-dry). Asterisks denote significant differences ( $p < 0.05$ , two-sided Welch t-test; exact p-values in Supplementary Table 6). **k**, GEA for summer average temperature (Av. T) and summer relative humidity (RH) in the *HaMYB111* region. The dashed orange line represents Bayes Factor ( $BF_{18}$ ) = 10 deciban (dB). GEAs were calculated using two-sided XtX statistics.  $n = 71$  populations.

## Conclusions

Connecting adaptive variation to its genetic basis is one of the main goals of evolutionary biology. Here, we show that regulatory variation at a single major gene, the transcription factor

*HaMYB111*, underlies most of the variation for floral UV patterns in wild *H. annuus*, and that these UV patterns not only have a strong effect on pollinator visitation, but they also co-vary with geoclimatic variables (especially relative humidity and temperature) and affect desiccation rates in ligules. By reducing the amount of transpiration in environments with lower relative humidity, UV-absorbing pigments in the ligule help prevent excessive water loss and maintain ligule turgidity; in humid, hot environments (e.g. Southern Texas), lower accumulation of flavonol glycosides would instead promote transpiration from ligules, keeping them cool and avoiding over-heating. The presence of UV pigmentation in the petals of *Arabidopsis* (also controlled by the *Arabidopsis* homolog of *MYB111*) further points to a more general protective role of these pigments in flowers, since pollinator attraction is likely not critical for fertilization in this largely selfing species. Additionally, a role in reducing water loss from petals is consistent with the overall trend in increased size of floral UV patterns over the past 80 years that has been observed in herbarium specimens<sup>4</sup>; due to changing climates, relative humidity over land has been decreasing in recent decades, which could result in higher transpiration rates<sup>39</sup>. Further studies will be required to confirm the existence of this trend and assess its strength.

More generally, our study highlights the complex nature of adaptive variation, with selection pressures from both biotic and abiotic factors shaping the patterns of diversity that we observe across natural populations. Floral diversity in particular has long been attributed to the actions of animal pollinators. Our work adds to a growing literature demonstrating the contributions of abiotic factors, most notably drought and heat stress, to this diversity. In sum, it is not all about sex, even for flowers.

## References

- 1 Fattorini, R. & Glover, B. J. Molecular mechanisms of pollination biology. *Annual review of plant biology* **71**, 487-515 (2020).
- 2 Galen, C. High and dry: drought stress, sex-allocation trade-offs, and selection on flower size in the alpine wildflower *Polemonium viscosum* (Polemoniaceae). *Am Nat* **156**, 72-83 (2000).
- 3 Koski, M. H. & Ashman, T.-L. Floral pigmentation patterns provide an example of Gloger's rule in plants. *Nature Plants* **1**, 1-5 (2015).
- 4 Koski, M. H., MacQueen, D. & Ashman, T. L. Floral Pigmentation Has Responded Rapidly to Global Change in Ozone and Temperature. *Curr Biol* **30**, 4425-4431 (2020).
- 5 Lambrecht, S. C. & Dawson, T. E. Correlated variation of floral and leaf traits along a moisture availability gradient. *Oecologia* **151**, 574-583 (2007).
- 6 Strauss, S. Y. & Whittall, J. B. Non-pollinator agents of selection on floral traits. *Ecology and evolution of flowers*, 120-138 (2006).
- 7 Chittka, L., Shmida, A., Troje, N. & Menzel, R. Ultraviolet as a component of flower reflections, and the colour perception of Hymenoptera. *Vision research* **34**, 1489-1508 (1994).
- 8 Tovée, M. J. Ultra-violet photoreceptors in the animal kingdom: their distribution and function. *Trends in ecology & evolution* **10**, 455-460 (1995).
- 9 Brock, M. T. *et al.* Genetic architecture, biochemical underpinnings and ecological impact of floral UV patterning. *Molecular ecology* **25**, 1122-1140 (2016).
- 10 Horth, L., Campbell, L. & Bray, R. Wild bees preferentially visit *Rudbeckia* flower heads with exaggerated ultraviolet absorbing floral guides. *Biology open* **3**, 221-230 (2014).

- 11 Sheehan, H. *et al.* MYB-FL controls gain and loss of floral UV absorbance, a key trait affecting pollinator preference and reproductive isolation. *Nature genetics* **48**, 159 (2016).
- 12 Gronquist, M. *et al.* Attractive and defensive functions of the ultraviolet pigments of a flower (*Hypericum calycinum*). *Proceedings of the National Academy of Sciences* **98**, 13745-13750 (2001).
- 13 Koski, M. H. & Ashman, T. L. Macroevolutionary patterns of ultraviolet floral pigmentation explained by geography and associated bioclimatic factors. *New Phytologist* **211**, 708-718 (2016).
- 14 Full emoji list, v13.0, <https://unicode.org/emoji/charts/full-emoji-list.html> (2020).
- 15 Harborne, J. B. & Smith, D. M. Anthochlors and other flavonoids as honey guides in the Compositae. *Biochemical Systematics and Ecology* **6**, 287-291 (1978).
- 16 Koski, M. H. & Ashman, T. L. Dissecting pollinator responses to a ubiquitous ultraviolet floral pattern in the wild. *Functional Ecology* **28**, 868-877 (2014).
- 17 Koski, M. H. & Ashman, T.-L. Quantitative variation, heritability, and trait correlations for ultraviolet floral traits in *Argentina anserina* (Rosaceae): Implications for floral evolution. *International Journal of Plant Sciences* **174**, 1109-1120 (2013).
- 18 Moyers, B. T., Owens, G. L., Baute, G. J. & Rieseberg, L. H. The genetic architecture of UV floral patterning in sunflower. *Annals of botany* **120**, 39-50 (2017).
- 19 Todesco, M. *et al.* Massive haplotypes underlie ecotypic differentiation in sunflowers. *Nature* **584**, 602-607 (2020).

- 20 Stracke, R. *et al.* Differential regulation of closely related R2R3-MYB transcription factors controls flavonol accumulation in different parts of the *Arabidopsis thaliana* seedling. *Plant J* **50**, 660-677 (2007).
- 21 Pollastri, S. & Tattini, M. Flavonols: old compounds for old roles. *Annals of Botany* **108**, 1225-1233 (2011).
- 22 Rieseberg, L. H. & Schilling, E. E. Floral flavonoids and ultraviolet patterns in *Viguiera* (Compositae). *American journal of botany* **72**, 999-1004 (1985).
- 23 Klepikova, A. V., Kasianov, A. S., Gerasimov, E. S., Logacheva, M. D. & Penin, A. A. A high resolution map of the *Arabidopsis thaliana* developmental transcriptome based on RNA-seq profiling. *The Plant Journal* **88**, 1058-1070 (2016).
- 24 Hoffmann, M. *et al.* Flower visitors in a natural population of *Arabidopsis thaliana*. *Plant Biology* **5**, 491-494 (2003).
- 25 Badouin, H. *et al.* The sunflower genome provides insights into oil metabolism, flowering and Asterid evolution. *Nature* **546**, 148-152 (2017).
- 26 Schlangen, K. *et al.* Formation of UV-honey guides in *Rudbeckia hirta*. *Phytochemistry* **70**, 889-898 (2009).
- 27 Schneiter, A. & Miller, J. Description of sunflower growth stages. *Crop Science* **21**, 901-903 (1981).
- 28 Mandel, J. R. *et al.* Association mapping and the genomic consequences of selection in sunflower. *PLoS Genet* **9**, e1003378 (2013).
- 29 Hurd Jr, P. D., LeBerge, W. E. & Linsley, E. G. Principal sunflower bees of North America with emphasis on the southwestern United States (Hymenoptera, Apoidea). *Smithsonian contributions to zoology* (1980).

- 30 Nakabayashi, R. *et al.* Enhancement of oxidative and drought tolerance in *Arabidopsis* by overaccumulation of antioxidant flavonoids. *Plant J* **77**, 367-379 (2014).
- 31 Schulz, E., Tohge, T., Zuther, E., Fernie, A. R. & Hinch, D. K. Natural variation in flavonol and anthocyanin metabolism during cold acclimation in *Arabidopsis thaliana* accessions. *Plant, cell & environment* **38**, 1658-1672 (2015).
- 32 Stapleton, A. E. Ultraviolet radiation and plants: burning questions. *The Plant Cell* **4**, 1353 (1992).
- 33 Peach, K., Liu, J. W. & Mazer, S. J. Climate Predicts UV Floral Pattern Size, Anthocyanin Concentration, and Pollen Performance in *Clarkia unguiculata*. *Front Plant Sci* **11**, 847 (2020).
- 34 Atamian, H. S. *et al.* Circadian regulation of sunflower heliotropism, floral orientation, and pollinator visits. *Science* **353**, 587-590 (2016).
- 35 Nunez, M., Forgan, B. & Roy, C. Estimating ultraviolet radiation at the earth's surface. *International Journal of Biometeorology* **38**, 5-17 (1994).
- 36 Nakabayashi, R., Mori, T. & Saito, K. Alternation of flavonoid accumulation under drought stress in *Arabidopsis thaliana*. *Plant Signal Behav* **9**, e29518 (2014).
- 37 Lambrecht, S. C. Floral water costs and size variation in the highly selfing *Leptosiphon bicolor* (Polemoniaceae). *International Journal of Plant Sciences* **174**, 74-84 (2013).
- 38 Burke, J. J. & Upchurch, D. R. Leaf temperature and transpirational control in cotton. *Environmental and experimental botany* **29**, 487-492 (1989).
- 39 Byrne, M. P. & O'Gorman, P. A. Trends in continental temperature and humidity directly linked to ocean warming. *Proc Natl Acad Sci U S A* **115**, 4863-4868 (2018).



## Methods

### Plant material and growth conditions

Sunflower lines used in this paper were previously described<sup>19</sup> (2016 common garden, see below), grown from seeds collected from wild populations<sup>19</sup>, or obtained from the North Central Regional Plant Introduction Station in Ames, Iowa, USA. Sunflower seeds were surface sterilized by immersion for 10 minutes in a 1.5% sodium hypochlorite solution. Seeds were then rinsed twice in distilled water and treated for at least one hour in a solution of 1% PPM (Plant Cell Technologies, Washington, DC, USA), a broad-spectrum biocide/fungicide, to minimize contamination, and 0.05 mM gibberellic acid (Sigma-Aldrich, St. Louis, MO, USA). They were then scarified, de-hulled, and kept for two weeks at 4°C in the dark on filter paper moistened with a 1% PPM solution. Following this, seeds were kept in the dark at room temperature until they germinated. For common garden experiments, the seedlings were then transplanted in peat pots, grown in a greenhouse for two weeks, then moved to an open-sided greenhouse for a week for acclimation, and finally transplanted in the field. For all other experiments seedlings were transplanted in 2-gallon pots filled with Sunshine #1 growing mix (Sun Gro Horticulture Canada, Abbotsford, BC, Canada). For the wild sunflower species shown in Extended Data Fig. 1B, following sterilization, seeds were scarified and then dipped in fusicosin solution (1.45  $\mu$ M) for 15 minutes, dehulled, germinated in the dark for at least 8-10 days, and then grown in pots for three weeks before transplanting into 2-gallon pots filled with a blend of sandy loam, organic compost and mulch. Those plants were grown at the UC Davis field experiment station (California, USA) from July to October 2017. A complete list of sunflower accessions and their populations of origin is reported in Supplementary Tables 1 and 2.

Seeds from the following Arabidopsis lines were obtained from the Arabidopsis Biological Resource Center: Col-0 (CS28167), *myb111* (CS9813), *myb12* (CS9602) and *myb12/myb111* (CS9980). Seeds were stratified in 0.1% agar at 4 °C in the dark for four days, and then sown in 2-gallon pots containing Sunshine #1 growing mix. Plants were grown in growth chamber at 23 °C in long-day conditions (16 h light, 8 h dark).

### **Common garden**

Two common garden experiments were performed, in 2016 and 2019. After germination and acclimation, plants were transplanted at the Totem Plant Science Field Station of the University of British Columbia (Vancouver, Canada) using a completely randomized design.

In the summer of 2016, ten plants from each of 151 selected populations of wild *H. annuus*, *H. petiolaris*, *H. argophyllus* and *H. niveus* were grown. Plants were transplanted in the field on the 25<sup>th</sup> of May (*H. argophyllus*), 2<sup>nd</sup> of June (*H. petiolaris* and *H. niveus*) and 7<sup>th</sup> of June 2016 (*H. annuus*). Up to four inflorescences from each plant were collected for visible and UV photography.

In the summer of 2019, fourteen plants from each of 106 populations of wild *H. annuus* were transplanted in the field on 6<sup>th</sup> of June. At least two ligules from different inflorescences for each plant were collected for visible and UV photography.

Researcher were not blinded as to the identity of individual samples. However, information about their populations of origin and/or LUVp phenotype were not attached to the samples during data acquisition.

## Ultraviolet and infrared photography

Ultraviolet patterns were imaged in whole flowerheads or detached ligules using a Nikon D70s digital camera, fitted with a Noflexar 35-mm lens and a reverse-mounted 2-inch Baader U-Filter (Baader Planetarium, Mammendorf, Germany), which only allows the transmission of light between 320 and 380 nm. Wild sunflower species shown in Extended Data Fig. 1B were imaged using a Canon DSLR camera in which the internal hot mirror filter had been replaced with a UV bandpass filter (LifePixel, Mukilteo, WA). The whole length of the ligule ( $L_L$ ) and the length of the UV-absorbing part at the base of the ligule ( $L_{UV-abs}$ ) were measured using Fiji<sup>40,41</sup>. Ligule UV proportion was measured as the ratio between the two ( $LUVp = L_{UV-abs}/L_L$ ). In some *H. annuus* individuals, the upper, “UV-reflecting” portion of the ligules ( $L_{UV-ref}$ ) also displayed a lower level of UV-absorption; in those cases, these regions were weighted at 50% of fully UV-absorbing regions, using the formula  $LUVp = (L_{UV-abs}/L_L) + \frac{1}{2}(L_{UV-ref}/L_L)$ . For inflorescences, LUVp was averaged from three different ligules. For each individual, LUVp values were averaged between all the inflorescences or detached ligules measurements.

Infrared pictures were taken using a Fluke TiX560 thermal imager (Fluke Corporation, Everett, WA, USA) and analyzed using the Fluke Connect software (v1.1.536.0). For time series experiments, plants were germinated as above (see “Common Garden”), grown in 2-gallon pots in a greenhouse until they produced four true leaves, and then moved to the field. On three separate days in August 2017, pairs of inflorescences with opposite floral UV patterns at similar developmental stages were selected and made to face east. Infrared images were taken just before sunrise, ~5 minutes after sunrise, and then at 0.5, 1, 2, 3 and 4 hours after sunrise. For infrared pictures of detached ligules, plants were grown in a greenhouse. Flowerheads were collected and kept overnight in a room with constant temperature of 21 °C, with their stems

immersed in a beaker containing distilled water. The following day, pairs of ligules with large or small LUVp from different individuals were removed and arranged on a sheet of white paper. Infrared pictures were taken immediately before exposing the ligules to the sun, and again 15 minutes after that.

### **Library preparation, sequencing and SNP calling**

Whole-genome shotgun (WGS) sequencing library preparation and sequencing, as well as SNP calling and variant filtering, for the *H. annuus* and *H. petiolaris* individuals used for GWA analyses in this paper were previously described<sup>19</sup>. Briefly, DNA was extracted from leaf tissue using a modified CTAB protocol<sup>42,43</sup>, the DNeasy Plant Mini Kit or a DNeasy 96 Plant Kit (Qiagen, Hilden, Germany). Genomic DNA was sheared to an average fragment size of 400 bp using a Covaris M220 ultrasonicator (Covaris, Woburn, MA, USA). Libraries were prepared using a protocol largely based on Rowan *et al.*, 2015<sup>44</sup>, the TruSeq DNA Sample Preparation Guide from Illumina (Illumina, San Diego, CA, USA) and Rolhand *et al.*, 2012<sup>45</sup>, with the addition of an enzymatic repeats depletion step using a Duplex-Specific Nuclease (DSN; Evrogen, Moscow, Russia)<sup>19,46,47</sup>. All libraries were sequenced at the McGill University and Génome Québec Innovation Center on HiSeq2500, HiSeq4000 and HiSeqX instruments (Illumina, San Diego, CA, USA) to produce paired end, 150 bp reads.

Sequences were trimmed for low quality using Trimmomatic<sup>48</sup> (v0.36) and aligned to the *H. annuus* XRQv1 genome<sup>25</sup> using NextGenMap<sup>49</sup> (v0.5.3). We followed the best practices recommendations of The Genome Analysis ToolKit (GATK)<sup>50</sup> and executed steps documented in GATK's germline short variant discovery pipeline (for GATK 4.0.1.2). During genotyping, to reduce computational time and improve variant quality, genomic regions containing transposable

elements were excluded<sup>25</sup>. We then used GATK's VariantRecalibrator (v4.0.1.2) to select high quality variants. SNP data were then filtered for minor allele frequency (MAF)  $\geq 0.01$ , genotype rate  $\geq 90\%$ , and to keep only bi-allelic SNPs.

Filtered SNPs were then re-mapped to the improved reference assembly HA412-HOv2<sup>51</sup> using BWA (v0.7.17)<sup>52</sup>. These re-mapped SNPs were used for all analyses, excluding the GWA for the region surrounding the *HaMYB111* locus that used un-filtered variants based on the XRQv1 assembly (Extended Data Fig. 2b).

The SNP dataset used to determine the genotype at the Chr15\_LUVp SNP in other species (*H. argophyllus*, *H. niveus*, *H. debilis*, *H. decapetalus*, *H. divaricatus* and *H. grosseserratus*) was based on WGS data generated for Todesco *et al.* 2020<sup>19</sup> and is described in Owens *et al.* 2021<sup>53</sup>. Sequence data for the Sunflower Association Mapping population was reported in Hübner *et al.* 2019<sup>54</sup>.

### **Genome-wide association mapping**

Genome-wide association analyses for LUVp were performed for *H. annuus*, *H. petiolaris petiolaris* and *H. petiolaris fallax*, using two-sided mixed models implemented in EMMAX<sup>55</sup> (v07Mar2010) or in the EMMAX module in EasyGWAS<sup>56</sup>. For all runs, the first three principal components (PCs) were included as covariates, as well as a kinship matrix. Only SNPs with MAF  $>5\%$  were included in the analyses.

### **F<sub>2</sub> populations and genotyping**

Individuals from population ANN\_03 from California, USA (large LUVp) and ANN\_55 from Texas, USA (small LUVp) were grown in 2-gallon pots in a field. When the plants reached maturity, they were moved to a greenhouse, where several inflorescences were bagged and crossed. The resulting F<sub>1</sub> seeds were germinated and grown in a greenhouse, and pairs of siblings were crossed (wild sunflowers are overwhelmingly self-incompatible). The resulting F<sub>2</sub> populations were grown both in a greenhouse in the winter of 2019 ( $n = 42$  individuals for population 1, 38 individuals for population 2) and in a field as part of the 2019 common garden experiments ( $n = 54$  individuals for population 1, 50 individuals for population 2). DNA was extracted from young leaf tissue as described above. All plants were genotyped for the Chr15\_LUVp SNPs using a custom TaqMan SNP genotyping assay (Thermo Fisher Scientific, Waltham, MA, USA) on a Viia 7 Real-Time PCR system (Thermo Fisher Scientific).

### **Metabolite analyses**

Methanolic extractions were performed following Stracke *et al.* 2007<sup>20</sup>. Sunflower ligules and *Arabidopsis* petals were collected and flash-frozen in liquid nitrogen. The tissue was ground to a fine powder by adding 10-15 zirconia beads (1 mm diameter) and using a TissueLyser (Qiagen) for sunflower ligules, or using a plastic pestle in a 1.5 ml tube for *Arabidopsis* petals. 0.5 ml of 80% methanol were added, and the samples were further homogenized and incubated at 70 °C for 15 minutes. They were then centrifuged at 15,000g for 10 minutes, and the supernatant was dried in a SpeedVac (Thermo Fisher Scientific) at 60°C. Samples were then resuspended in 1 µl (sunflower) or 2.5 µl (*Arabidopsis*) of 80% methanol for every mg of initial tissue.

The extracts were analyzed by LC/MS/MS using an Agilent 1290 UHPLC system (Agilent Technologies, Santa Clara, CA, USA) coupled with an Agilent 6530 Quadrupole Time of Flight

mass spectrometer. The chromatographic separation was performed on Atlantis T3- C18 reversed-phase (50 mm × 2.1 mm, 3 μm) analytical columns (Waters Corp, Milford, MA, USA). The column temperature was set at 40 °C. The elution gradient consisted of mobile phase A (water and 0.2% formic acid) and mobile phase B (acetonitrile and 0.2% formic acid). The gradient program was started with 3% B, increased to 25% B in 10 min, then increased to 40% B in 13 min, increased to 90% B in 17 min, held for 1 min and equilibrated back to 3% B in 20 min. The flow rate was set at 0.4 mL/min and injection volume was 1 μL. A PDA (photo diode array) detector was used for detection of UV-absorption in the range of 190-600 nm. MS and MS/MS detection were performed using an Agilent 6530 accurate mass Quadrupole Time of Flight mass spectrometer equipped with an ESI (electrospray) source operating in both positive and negative ionization modes. Accurate positive ESI LC/MS and LC/MS/MS data were processed using the Agilent MassHunter software to identify the analytes. The ESI conditions were as follows: nebulizing gas (nitrogen) pressure and temperature were 30 psi and 325°C; sheath gas (nitrogen) flow and temperature were 12 L/min, 325°C; dry gas (nitrogen) was 7 L/min. Full scan mass range was 50-1700 m/z. Stepwise fragmentation analysis (MS/MS) was carried out with different collision energies depending on the compound class.

### **Transgenes and expression assays**

Total RNA was isolated from mature and developing ligules, or part of ligules, using TRIzol (Thermo Fisher Scientific) and cDNA was synthesized using the RevertAid First Strand cDNA Synthesis kit (Thermo Fisher Scientific). Genomic DNA was extracted from leaves of *Arabidopsis* using CTAB<sup>42</sup>. A 1959 bp-long fragment (*pAtMYB111*) from the promoter region of *AtMYB111* (*At5g49330*), including the 5'-UTR of the gene, was amplified using Phusion High-

Fidelity DNA polymerase (New England Biolabs, Ipswich, MA, USA) and introduced in pFK206 derived from pGREEN<sup>57</sup>. Alleles of *HaMYB111* were amplified from cDNA from ligules, and placed under the control of *pAtMYB111* (in the plasmid describe above) or of the constitutive *CaMV 35S* promoter (in pFK210, derived as well from pGREEN<sup>57</sup>). Constructs were introduced into *A. thaliana* plants by *Agrobacterium tumefaciens*-mediated transformation (strain GV3101)<sup>58</sup>. At least five independent transgenic lines with levels of UV pigmentation comparable to the ones shown in Fig. 3d were recovered for each construct. For expression analyses, qPCRs were performed on cDNA from ligules using the SsoFast EvaGreen Supermix (Bio-Rad, Hercules, CA, USA) on a CFX96 Real-Time PCR Detection System (Bio-Rad). Ligules from three individuals were assayed for each species and developmental stage, and three technical replicates were analyzed for each sample. Expression levels were normalized against *HaEF1 $\alpha$* . Primers used for cloning and qRT-PCR are given in Supplementary Table 8.

### **Sanger and PacBio sequencing**

Fragments ranging in size from 1.5 to 5.5 kbp were amplified from genomic DNA of 20 individuals that had been previously re-sequenced<sup>19</sup>, and whose genotype at the Chr15\_LUVp SNP was therefore known, using Phusion High-Fidelity DNA polymerase (New England Biolabs). Fragments were then cloned in either pBluescript or pJET (Thermo Fisher Scientific) and sequenced on a 3730S DNA analyzer using BigDye Terminator v3.1 sequencing chemistry (Applied Biosystem, Foster City, CA, USA).

For long reads sequencing, seed from wild *H. annuus* populations known to be homozygous for different alleles at the Chr15\_LUVp SNP were germinated and grown in a greenhouse. After confirming that they had the expected LUVp phenotype, branches from each plant were covered



with dark cloth for several days, and young, etiolated leaves were collected and immediately frozen in liquid nitrogen. High molecular weight (HMW) DNA was extracted using a modified CTAB protocol<sup>59</sup>. All individuals were genotyped for the Chr15\_LUVp SNP using a custom TaqMan SNP genotyping assay (Thermo Fisher Scientific, see above) on a CFX96 Real-Time PCR Detection System (Bio-Rad). Two individuals, one with large and one with small LUVp, were selected. HiFi library preparation and sequencing were performed at the McGill University and Génome Québec Innovation Center on a Sequel II instrument (PacBio, Menlo Park, CA, USA). Each individual was sequenced on an individual SMRT cell 8M, resulting in average genome-wide sequencing coverage of 6-8X.

### **Pollinator preferences assays**

In September 2017, pollinator visits were recorded in individual inflorescences of pairs of plants with large and small LUVp grown in pots in a field adjacent the Nursery South Campus greenhouses of the University of British Columbia. Pairs of inflorescences were filmed using a Bushnell Trophy Cam HD (Bushnell, Overland Park, KS, USA) in 12-minute intervals.

Visitation rates were averaged over 14 such movies (Supplementary Table 5).

In summer 2019, pollinator visits were scored in a common garden experiment consisting of 1484 *H. annuus* plants at the Totem Plant Science Field Station of the University of British Columbia. Over five days, between the 29<sup>th</sup> of July and the 7<sup>th</sup> of August, pollinator visits on individual plants were counted over five-minute intervals, for a total of 435 series of measurements on 111 plants from 51 different populations (v). To generate a more homogenous and comparable dataset, measurements for plants with too few (1) or too many (>10) flowers were excluded from the final analysis.

### **Correlations with environmental variables and genotype-environment association analyses**

Twenty topo-climatic factors were extracted from climate data collected over a 30-year period (1961-1990) for the geographic coordinates of the population collection sites, using the software package Climate NA<sup>60</sup> (Supplementary Table 2). Additionally, UV radiation data were extracted from the gLUV dataset<sup>61</sup> using the R package “raster”<sup>62,63</sup>. Correlations between individual environmental variables and LUVp were calculated using the “lm” function implemented in R; a correlation matrix between all environmental variables and LUVp was calculated using the “cor” function in R and plotted using the “heatmap.2” function in the “gplots” package<sup>64</sup>.

GEAs were analyzed using BayPass<sup>65</sup> version 2.1. Population structure was estimated by choosing 10,000 putatively neutral random SNPs under the BayPass core model<sup>78</sup>. The Bayes factor (denoted  $BF_{is}$  as <sup>65</sup>) was then calculated under the standard covariate mode. For each SNP,  $BF_{is}$  was expressed in deciban units [dB,  $10 \log_{10}(BF_{is})$ ]. Significance was determined following<sup>65</sup>, and employing Jeffreys’ rule<sup>66</sup>, quantifying the strength of associations between SNPs and variables as “strong” ( $10 \text{ dB} \leq BF_{is} < 15 \text{ dB}$ ), “very strong” ( $15 \text{ dB} \leq BF_{is} < 20 \text{ dB}$ ) and decisive ( $BF_{is} \geq 20 \text{ dB}$ ).

### **Desiccation assays**

Inflorescence and leaves were collected from well-watered, greenhouse-grown plants, and brought to an environment kept at 21°C. They were left overnight with their stems or petioles immersed in a beaker containing distilled water. The following morning 1-2 leaves from each plant, and three ligules from each inflorescence were individually weighed and hanged to air dry

at room temperature (21 °C). Their weight was measured at one-hour intervals for five hours, and then again the following morning. Leaves and ligules were then incubated for 48 hours at 65 °C in an oven to determine their dry weight. Total water content was measured as the difference between the initial fresh weight ( $W_0$ ) and dry weight ( $W_d$ ). Water loss was expressed as a fraction of the total water content of each organ, using the formula  $[(W_i - W_d)/(W_0 - W_d)] \times 100$ , where  $W_i$  is the weight of a sample at a time  $i$ . The assay was performed on samples from 16 (ligules) or 15 (leaves) individuals belonging to 7 (ligules) or 8 (leaves) different populations of *H. annuus*.

### **Data availability**

All raw sequenced data are stored in the Sequence Read Archive (SRA) under BioProjects PRJNA532579, PRJNA398560, PRJNA564337 and PRJNA736734. Filtered SNP datasets are available at <https://rieseberglab.github.io/ubc-sunflower-genome/>. Raw sequencing data and SNP datasets have been previously described in Todesco *et al.*, 2020<sup>19</sup>. The sequences of individual alleles at the *HaMYB111* locus and of *HaMYB111* coding sequences have been deposited at GenBank under accession numbers XXX-XXX and XXX-XXX, respectively. All other data are available in the main text or the supplementary materials.

## Methods references

- 40 Schindelin, J. *et al.* Fiji: an open-source platform for biological-image analysis. *Nat. Methods* **9**, 676 (2012).
- 41 Schneider, C. A., Rasband, W. S. & Eliceiri, K. W. NIH Image to ImageJ: 25 years of image analysis. *Nat. Methods* **9**, 671 (2012).
- 42 Murray, M. G. & Thompson, W. F. Rapid isolation of high molecular weight plant DNA. *Nucleic Acids Res.* **8**, 4321-4325 (1980).
- 43 Zeng, J., Zou, Y., Bai, J. & Zheng, H. Preparation of total DNA from recalcitrant plant taxa. *Acta Bot. Sin.* **44**, 694-697 (2002).
- 44 Rowan, B. A., Patel, V., Weigel, D. & Schneeberger, K. Rapid and inexpensive whole-genome genotyping-by-sequencing for crossover localization and fine-scale genetic mapping. *G3 (Bethesda)* **5**, 385-398 (2015).
- 45 Rohland, N. & Reich, D. Cost-effective, high-throughput DNA sequencing libraries for multiplexed target capture. *Genome Res.* **22**, 939-946 (2012).
- 46 Matvienko, M. *et al.* Consequences of normalizing transcriptomic and genomic libraries of plant genomes using a duplex-specific nuclease and tetramethylammonium chloride. *PLoS One* **8**, e55913 (2013).
- 47 Shagina, I. *et al.* Normalization of genomic DNA using duplex-specific nuclease. *Biotechniques* **48**, 455-459 (2010).
- 48 Bolger, A. M., Lohse, M. & Usadel, B. Trimmomatic: a flexible trimmer for Illumina sequence data. *Bioinformatics* **30**, 2114-2120 (2014).
- 49 Sedlazeck, F. J., Rescheneder, P. & von Haeseler, A. NextGenMap: fast and accurate read mapping in highly polymorphic genomes. *Bioinformatics* **29**, 2790-2791 (2013).

- 50 Poplin, R. *et al.* Scaling accurate genetic variant discovery to tens of thousands of samples. *BioRxiv*, doi:10.1101/201178 (2017).
- 51 Sunflower genome database, <https://sunflowergenome.org/annotations/> (2021).
- 52 Li, H. Aligning sequence reads, clone sequences and assembly contigs with BWA-MEM. *ArXiv*, arXiv:1303.3997v1302 (2013).
- 53 Owens, G. L. *et al.* Standing variation rather than recent adaptive introgression likely underlies differentiation of the texanus subspecies of *Helianthus annuus*. *Molecular Ecology*, doi:10.1111/mec.16008 (2021).
- 54 Hubner, S. *et al.* Sunflower pan-genome analysis shows that hybridization altered gene content and disease resistance. *Nat. Plants* **5**, 54-62 (2019).
- 55 Kang, H. M. *et al.* Variance component model to account for sample structure in genome-wide association studies. *Nat. Genet.* **42**, 348-354 (2010).
- 56 Grimm, D. G. *et al.* easyGWAS: a cloud-based platform for comparing the results of Genome-Wide Association studies. *Plant Cell* **29**, 5-19 (2017).
- 57 Hellens, R. P., Edwards, E. A., Leyland, N. R., Bean, S. & Mullineaux, P. M. pGreen: a versatile and flexible binary Ti vector for *Agrobacterium*-mediated plant transformation. *Plant Mol. Biol.* **42**, 819-832 (2000).
- 58 Weigel, D. & Glazebrook, J. *Arabidopsis: A laboratory manual*. CSHL Press, Cold Spring Harbor, N.Y., USA (2002).
- 59 Stoffel, K. *et al.* Development and application of a 6.5 million feature Affymetrix Genechip® for massively parallel discovery of single position polymorphisms in lettuce (*Lactuca spp.*). *BMC genomics* **13**, 1-17 (2012).

- 60 Wang, T., Hamann, A., Spittlehouse, D. & Carroll, C. Locally downscaled and spatially customizable climate data for historical and future periods for North America. *PloS one* **11**, e0156720 (2016).
- 61 Beckmann, M. *et al.* gl UV: a global UV-B radiation data set for macroecological studies. *Methods in Ecology and Evolution* **5**, 372-383 (2014).
- 62 R Core Team. R: a language and environment for statistical computing. R foundation for statistical, Vienna, Austria, <https://www.r-project.org/> (2020).
- 63 Hijmans, R. J. Geographic Data Analysis and Modeling, <https://rspatial.org/raster/index.html> (2020).
- 64 Warnes, G. R. *et al.* gplots: various R programming tools for plotting data, <https://CRAN.R-project.org/package=gplots> (2009).
- 65 Gautier, M. Genome-wide scan for adaptive divergence and association with population-specific covariates. *Genetics* **201**, 1555-1579 (2015).
- 66 Jeffreys, H. Theory of Probability. Oxford, Clarendon Press (1961).
- 67 Stephens, J. D., Rogers, W. L., Mason, C. M., Donovan, L. A. & Malmberg, R. L. Species tree estimation of diploid *Helianthus* (Asteraceae) using target enrichment. *American Journal of Botany* **102**, 910-920 (2015).

## Acknowledgments

This research was conducted in the ancestral and unceded territory of the x<sup>w</sup>məθk<sup>w</sup>əy'əm (Musqueam) People. We thank Emma Borger, Quinn Anderson, Jennifer Lipka, Jasmine Lai, Hafsa Ahmed, Dominique Skonieczny, Ana Parra, Cassandra Konecny, Kelsie Morioka and Daniel Yang for assistance with field work and data acquisition, Melina Byron and Glen Healy at UBC and UC Davis Plant Sciences Field Station personnel for assistance with greenhouse and field experiments, Elizabeth Elle and Tyler Kelly for help planning the pollinator visitation experiments, Laura Marek and the USDA-ARS in Ames, IA, USA, for providing sunflower seeds, and Chase Mason for providing cuttings for *Phoebantus tenuifolius*. Maps were realized using tiles from Stamen Design (<https://stamen.com>), under CC BY 3.0, from data by OpenStreetMaps contributors (<https://openstreetmap.org>), under ODbL. Funding was provided by Genome Canada and Genome BC (LSARP2014-223SUN), the NSF Plant Genome Program (DBI-1444522 and DBI-1817628), the University of California, Berkeley, and an HFSP long-term postdoctoral fellowship to M.T. (LT000780/2013).

## Author contributions

M.T., N.B., B.K.B., L.H.R. conceived the study; M.T., N.B., A.K., I.I., O.D.R., S.V.H. performed the common garden experiments and collected UV measurements; M.T. generated and analyzed expression data and transgenic lines for *HaMYB111*; M.T. prepared samples for Sanger and PacBio sequencing; J.-S.L., G.L.O. performed read alignments, and SNP calling and filtering; M.T., G.L.O., M.J. analyzed genomic data; M.T., L.L.M. performed metabolite analyses for sunflower and *Arabidopsis*; M.T., N.B., O.D.R. performed and analyzed the pollinator preference

Todesco *et al.*

Floral UV patterns in sunflowers

experiments; M.T. performed and analyzed the thermal imaging and desiccation experiments; M.T. wrote the manuscript with contributions from N.B., I.I., G.L.O., L.M.L., B.K.B., L.H.R.

### **Competing interests**

The authors declare no competing interests.

### **Additional Information**

**Supplementary Information** is available for this paper.

**Corresponding authors:** Correspondence and requests for material should be addressed to [mtodesco@biodiversity.ubc.ca](mailto:mtodesco@biodiversity.ubc.ca) (M.T.), [lriesebe@mail.ubc.ca](mailto:lriesebe@mail.ubc.ca) (L.H.R.).



Extended Data Figures

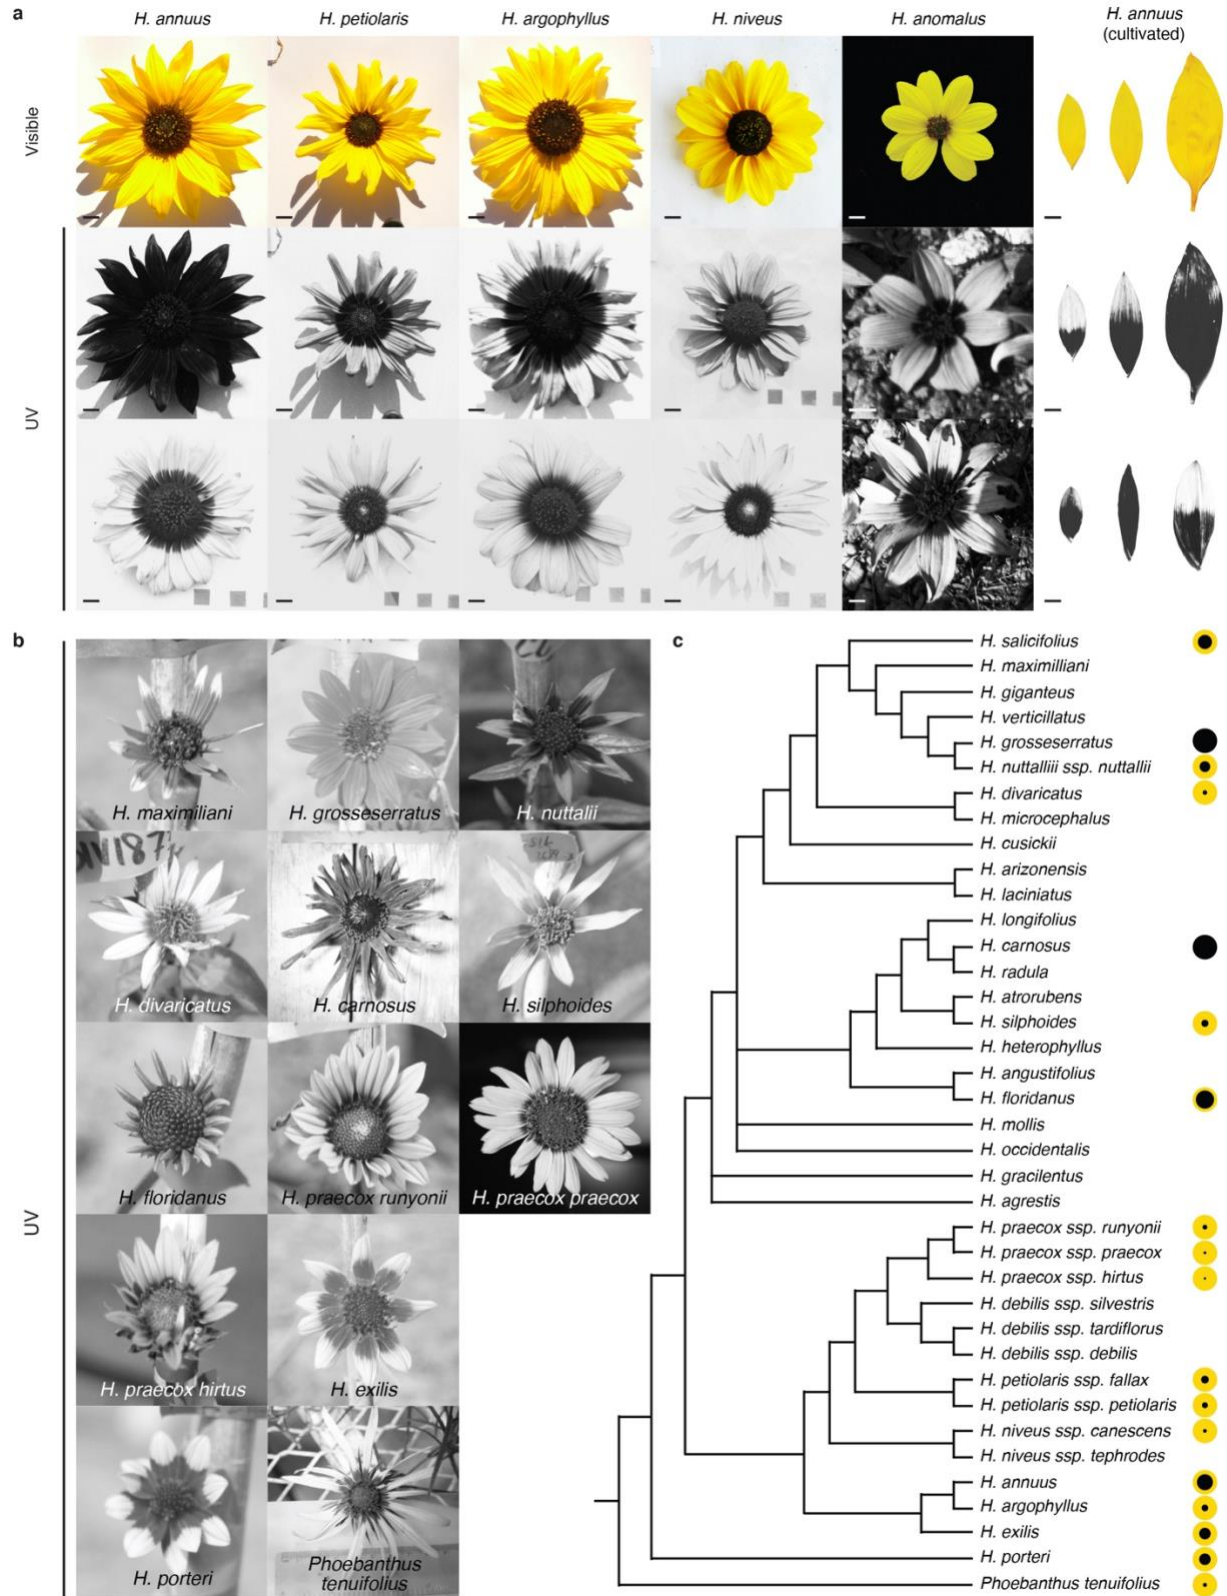

**Extended Data Fig. 1: Floral UV patterns in wild sunflower species and cultivated sunflower.**

**a**, Visible and UV images of inflorescences from five wild sunflower species, and ligules of six cultivated sunflower lines. Variation in floral UV patterns was found within all these species.

Scale bar = 1 cm. **b**, UV images of inflorescences from twelve wild sunflower species and for the outgroup *Phoebanthus tenuifolius*. Images are not to scale. **c**, Species tree for 31 sunflower species and *P. tenuifolius*, modified from Stephens *et al.*, 2015<sup>67</sup>. The size of the black dots to the right of each species name is proportional to the average size of bullseye patterns measured for that species or subspecies (Supplementary Table 1). For the species in **a**, bullseye values are averages for  $\geq 42$  individuals (see also Extended Data Fig. 4). For the species in **b**, bullseye values are for single individuals or averages for up to three individuals. Two taxa in the original species tree, *H. petiolaris* and *H. neglectus*, were renamed to *H. petiolaris ssp. petiolaris* and *H. petiolaris ssp. fallax* to reflect the current understanding of their identities.

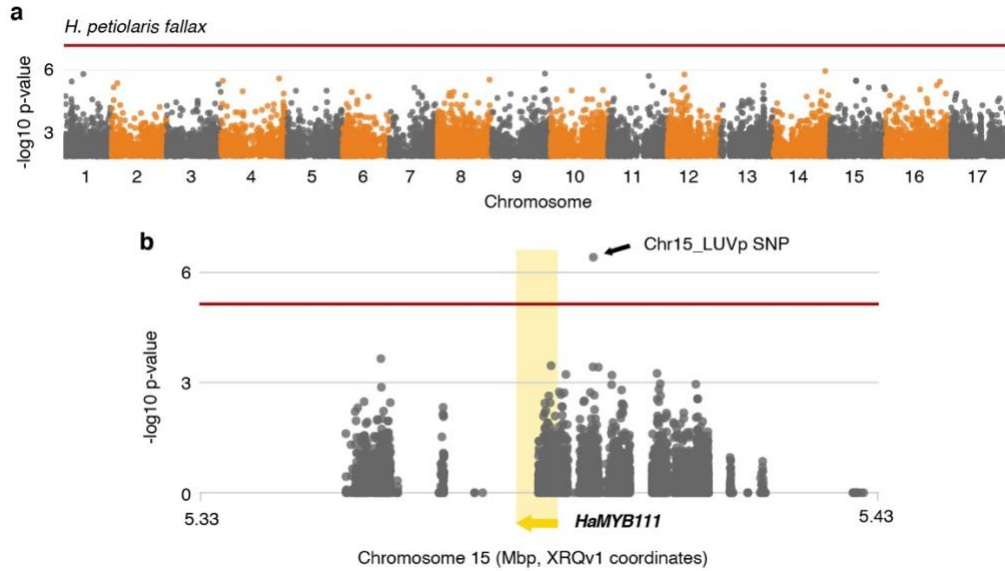

**Extended Data Fig. 2: Ligule UV proportion (LUVp) GWAS in *H. petiolaris fallax* and unfiltered *H. annuus* datasets.**

**a**, LUVp GWAS in *H. petiolaris fallax* ( $n = 193$  individuals). The red line represents 5% Bonferroni-corrected significance. Only positions with  $-\log_{10}$  p-value  $> 2$  are plotted. **b**, LUVp GWAS *H. annuus* using an un-filtered variants dataset in a 100 kbp region surrounding *HaMYB111* ( $n = 563$  individuals). Relaxing variant filtering parameters, to capture more of the polymorphisms at the *HaMYB111* locus, resulted in an almost 50-fold increase in the number of variants in this region, from 142 to 6949. Most regions in which no SNPs are reported contain highly repetitive sequences, and were masked before reads mapping. The red line represents 5% Bonferroni-corrected significance. GWAS were calculated using two-sided mixed models. As re-mapping to the improved HA412v2 reference assembly of the complete *H. annuus* set of  $>222$ M unfiltered variants would have been computationally intensive, positions are shown based on the original XRQv1 reference assembly.

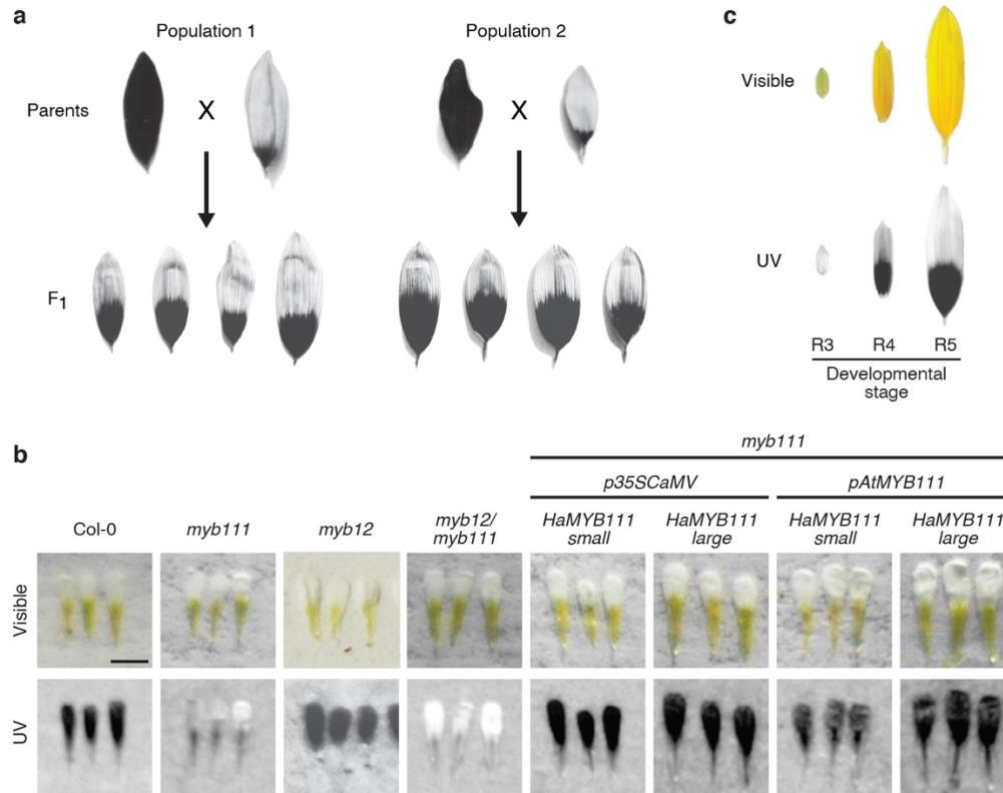

**Extended Data Fig. 3: Floral UV patterns in sunflower and Arabidopsis.**

**a**, UV images of ligules of the parental lines for the F<sub>2</sub> populations shown in Fig. 2e, and their F<sub>1</sub> progeny. A pair of F<sub>1</sub> plants was selected and crossed for each population to generate the F<sub>2</sub> progeny. **b**, Visible and UV images of Arabidopsis petals. Col-0 = wild type Arabidopsis. Scale bar = 1 mm. **c**, Stages of ligule development in *H. petiolaris*.

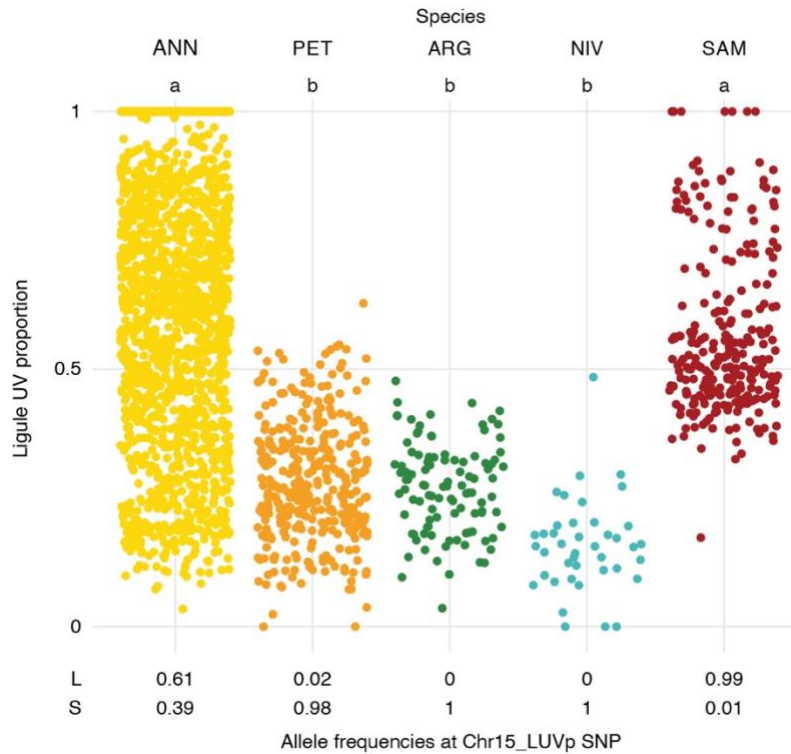

**Extended Data Fig. 4: LUVp variation in wild sunflower species and cultivated sunflower.**

LUVp values for individuals of four wild sunflower species and of the cultivated sunflower association mapping (SAM) population, and allele frequencies at the Chr15\_LUVp SNP. ANN = wild *H. annuus* ( $n = 1589$  from 110 populations), PET = *H. petiolaris* ( $n = 351$  individuals from 40 populations), ARG = *H. argophyllus* ( $n = 105$  individuals from 27 populations), NIV = *H. niveus* ( $n = 42$  individuals from 9 populations), SAM = cultivated *H. annuus* ( $n = 275$  individuals). Letters identify groups that are significantly different for  $p < 0.001$  (one-way ANOVA with post-hoc Tukey HSD test,  $F = 247$ ,  $df = 4$ ). Exact p-values for pairwise comparisons are reported in Supplementary Table 2.

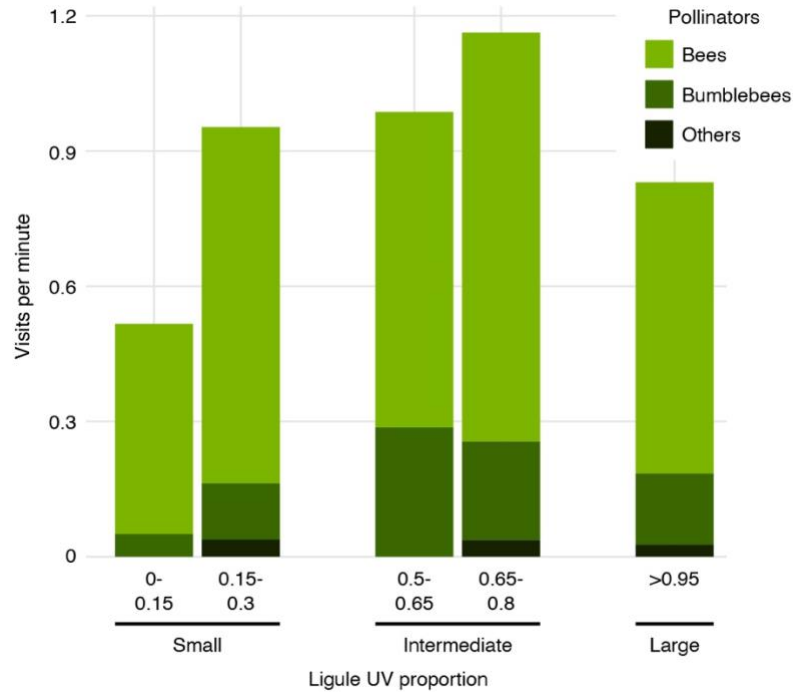

**Extended Data Fig. 5: Mean pollinator visits in the 2019 field experiment divided by category of pollinators.**

“Bees” were exclusively honey bees; “Bumblebees” included several *Bombus* species; “Others” were mostly *Megachile* bees ( $n = 1390$  pollinator visits). Pollinators were overwhelmingly bumblebees in the 2017 field experiment.

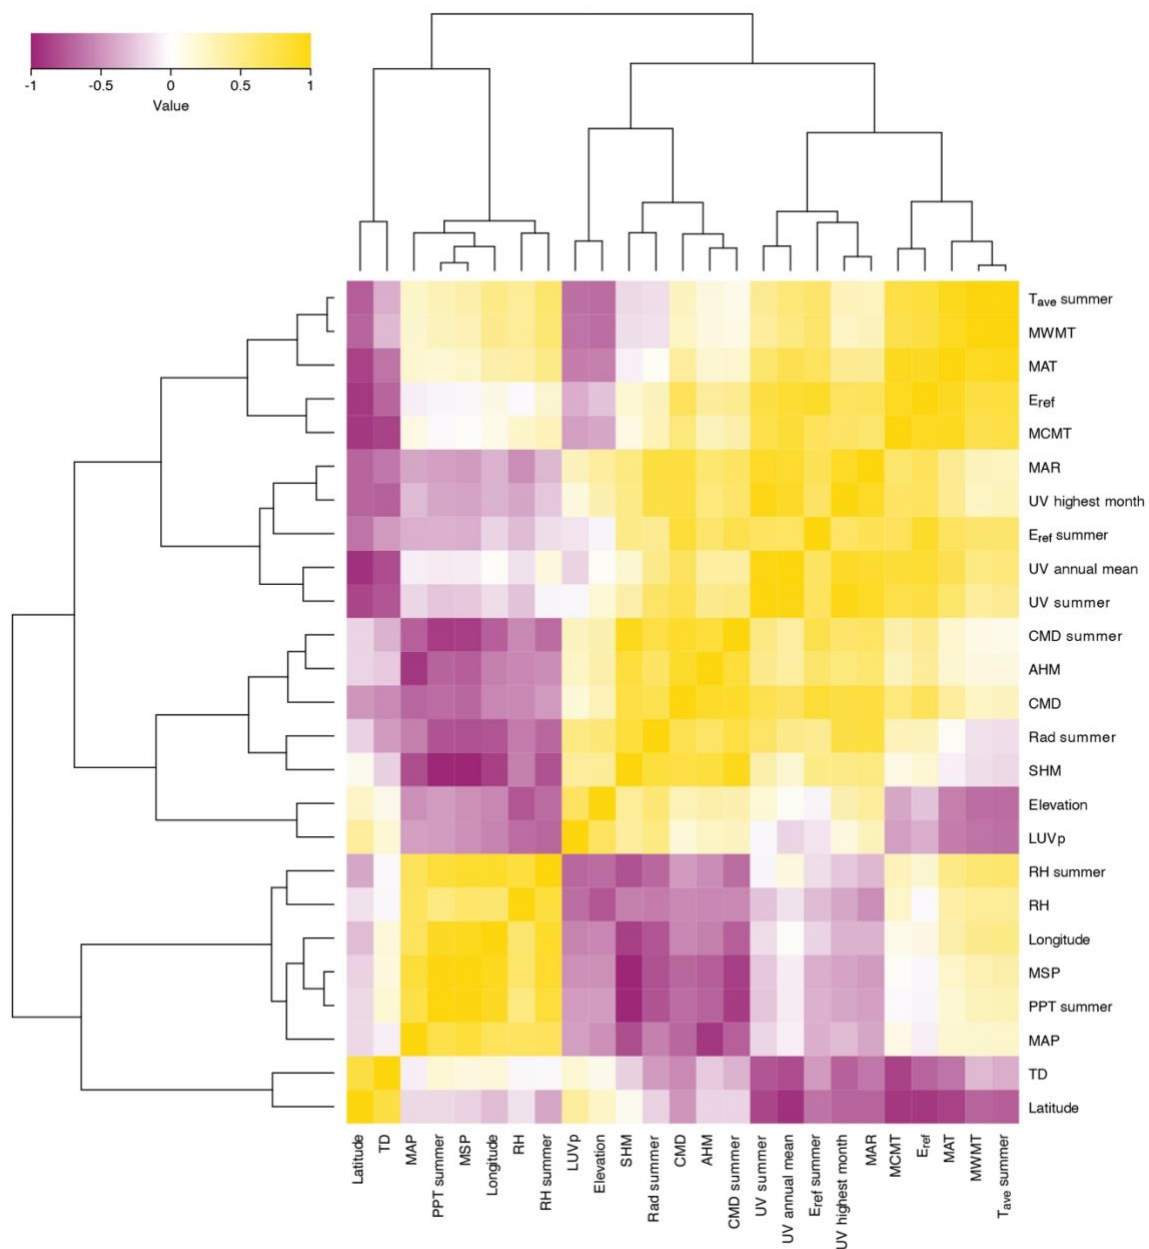

**Extended Data Fig. 6: Spearman correlation heatmap for LUVp and environmental variables in wild *H. annuus* populations.**

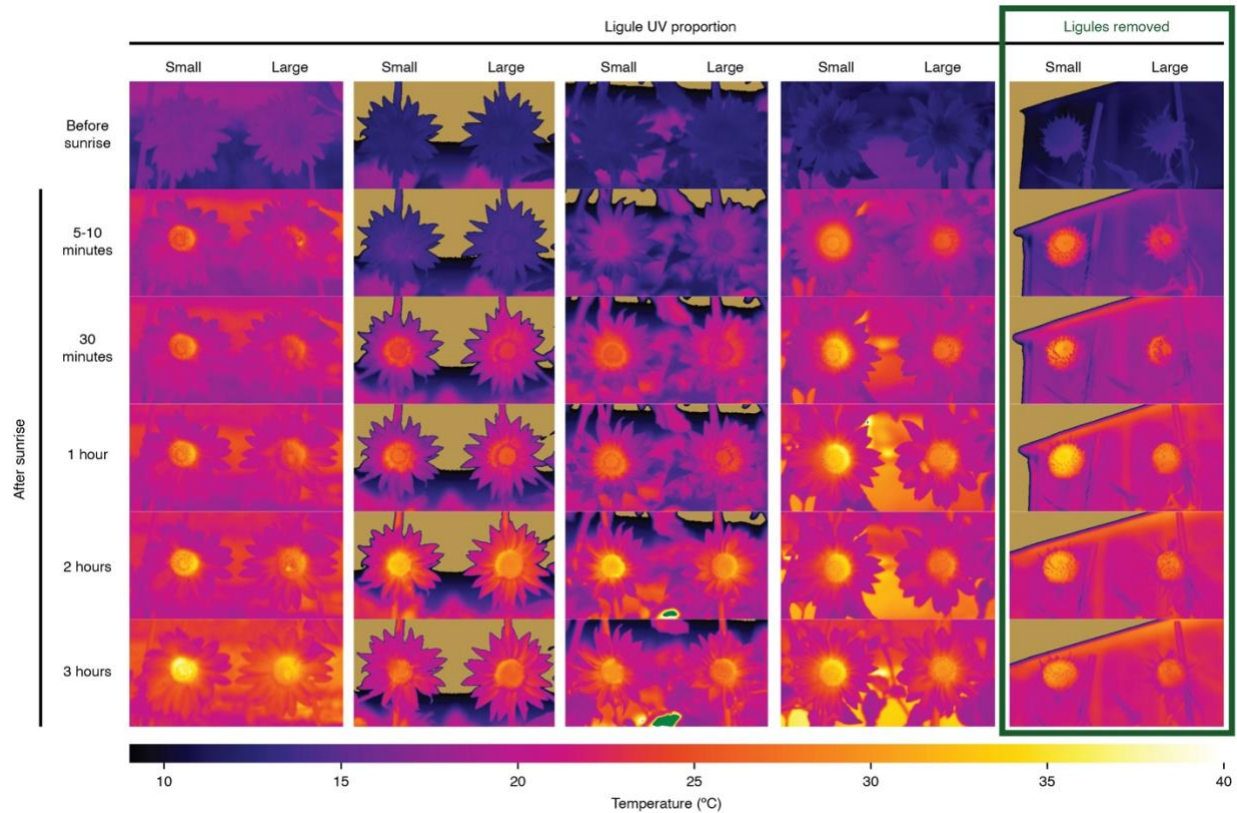

**Extended Data Fig. 7: Inflorescence temperature time series.** Infrared images of East-facing inflorescences of sunflowers with large ( $LUVp = 1$ ) or small ( $LUVp < 0.15$ ) floral UV patterns taken in the summer of 2017. No additional difference was observed in pictures taken more than three hours after sunrise. While no difference in temperature was observed in ligules, plants with small  $LUVp$  had consistently warmer disk flowers in these experiments. However, this effect is independent of ligule UV patterns, since it persists in inflorescences in which ligules were removed (right-most column). Pollinator visits were severely reduced for inflorescences with ligules removed. Bumblebees can be seen on the disk of inflorescences with large  $LUVp$  in the leftmost column of pictures, at 5-10 minutes and 2 hours. Temperatures values outside of the 10-40 °C interval are shown in beige (<10 °C) or green (>40 °C).



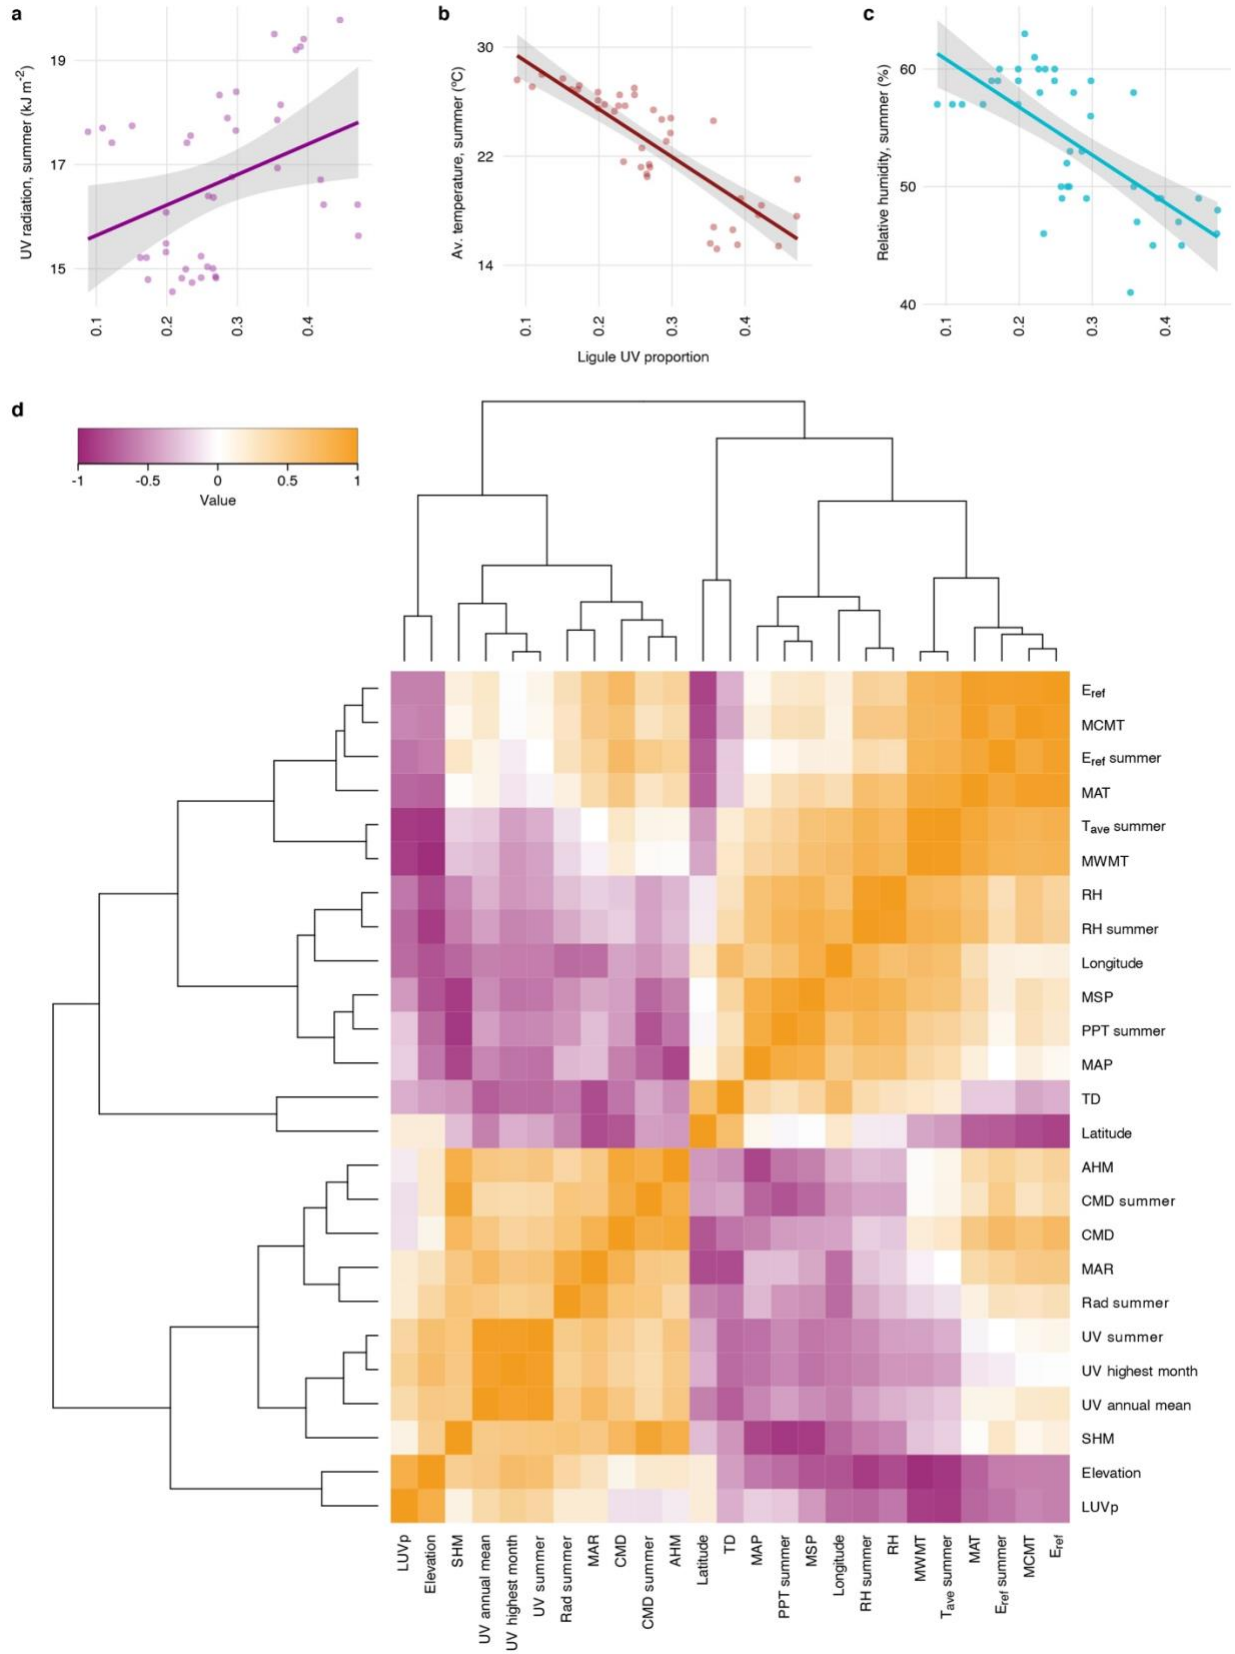

**Extended Data Fig. 8: Correlations between LUVp and environmental variables in *H.***

***petiolaris*.**

**a**, Correlation between average LUVp for different populations of *H. petiolaris* and summer UV radiation ( $R^2 = 0.11$ ,  $P = 0.02$ ), **b**, summer average temperature ( $R^2 = 0.69$ ,  $P = 10^{-11}$ ), or **c**, summer relative humidity ( $R^2 = 0.47$ ,  $P = 4.4 \times 10^{-7}$ ). Grey areas represent the 95% confidence interval. **d**, Spearman correlation heatmap for LUVp and environmental variables.
